# 1 Structural basis for EarP-mediated arginine glycosylation of 2 translation elongation factor EF-P

3

4 Ralph Krafczyk<sup>1\*</sup>, Jakub Macošek<sup>2\*</sup>, Daniel Gast<sup>3</sup>, Svetlana Wunder<sup>3</sup>, Pravin Kumar Ankush Jagtap<sup>2</sup>,  
5 Prithiba Mitra<sup>4</sup>, Amit Kumar Jha<sup>4</sup>, Jürgen Rohr<sup>4</sup>, Anja Hoffmann-Röder<sup>3</sup>, Kirsten Jung<sup>1</sup>, Janosch  
6 Hennig<sup>2\*\*</sup> and Jürgen Lassak<sup>1\*\*</sup>

7 <sup>1</sup> Center for Integrated Protein Science Munich (CIPSM) at the Department of Biology I, Microbiology,  
8 Ludwig Maximilians-Universität München, Munich, Germany

9 <sup>2</sup> Structural and Computational Biology Unit, EMBL Heidelberg, Heidelberg 69117, Germany

10 <sup>3</sup> Center for Integrated Protein Science Munich (CIPSM) at the Department of Chemistry, Ludwig-  
11 Ludwig Maximilians-Universität München, Munich, Germany

12 <sup>4</sup> University of Kentucky, College of Pharmacy, Lexington, USA.

13 + To whom correspondence should be addressed. Email: [juergen.lassak@lmu.de](mailto:juergen.lassak@lmu.de); [janosch.hennig@embl.de](mailto:janosch.hennig@embl.de)

14 \* These authors contributed equally to the work

## 15 ABSTRACT

16 Glycosylation is a universal strategy to post-translationally modify proteins. The recently discovered  
17 arginine rhamnosylation activates the polyproline specific bacterial translation elongation factor EF-P.  
18 EF-P is rhamnosylated on arginine 32 by the glycosyltransferase EarP. However, the enzymatic  
19 mechanism remains elusive. In the present study, we solved the crystal structure of EarP from  
20 *Pseudomonas putida*. The enzyme is composed of two opposing domains with Rossmann-folds, thus  
21 constituting a GT-B glycosyltransferase. While TDP-rhamnose is located within a highly conserved  
22 pocket of the C-domain, EarP recognizes EF-P via its KOW-like N-domain. Based on our structural  
23 data combined with an *in vitro* / *in vivo* enzyme characterization, we propose a mechanism of  
24 inverting arginine glycosylation. As EarP is essential for pathogenicity in *P. aeruginosa* our study  
25 provides the basis for targeted inhibitor design.

## 26 INTRODUCTION

27 Translation elongation is a non-uniform process and directly depends on the amino acids to be  
28 incorporated into the growing polypeptide chain.<sup>1</sup> Due to its chemical and physical properties, proline  
29 delays the peptidyl transfer reaction<sup>2</sup> and ribosomes can even stall upon translation of distinct diprolyl  
30 containing sequence motifs (Figure 1).<sup>3-4</sup> Such ribosome stalling is alleviated by the eukaryotic and  
31 archaeal elongation factor 5A (e/aEF-5A)<sup>5</sup> and its prokaryotic orthologue elongation factor P (EF-P).<sup>6-</sup>  
32 <sup>12</sup> The L-shaped EF-P is composed of three  $\beta$ -barrel domains and structurally resembles t-RNA in  
33 both size and shape.<sup>13</sup> EF-P binds to the polyproline-stalled ribosomes between the binding sites of  
34 peptidyl-tRNA (P-site) and the exiting tRNA (E-site)<sup>14</sup> and stimulates peptide bond formation by  
35 stabilization of the CCA end of the P-site prolyl-tRNA (Figure 1).<sup>15-16</sup> A conserved positively charged  
36 residue located at the tip of the EF-P KOW-like N-domain is essential for function.<sup>6, 15</sup> However, for full  
37 EF-P activity this residue is post-translationally elongated.<sup>17</sup> Certain bacteria, including

38 *Escherichia coli* and *Salmonella enterica*,  $\beta$ -lysinylate a conserved lysine K34<sup>EF-P</sup> by EpmA. This EF-P  
39 specific ligase uses  $\beta$ -(R)-lysine as substrate, which is generated by isomerization of  $\alpha$ -(S)-lysine  
40 employing the activity of the amino mutase EpmB.<sup>18-21</sup> By contrast, activation of a phylogenetically  
41 distinct group of EF-Ps encoded in species such as *Pseudomonas aeruginosa*, or  
42 *Neisseria meningitidis*, depends on rhamnosylation of an arginine R32<sup>EF-P</sup> in the equivalent position.<sup>15,</sup>  
43 <sup>22-23</sup> Rhamnosylation is mediated by the recently discovered glycosyltransferase EarP, which inverts  
44 the rhamnosyl moiety of the donor nucleotide sugar dTDP- $\beta$ -L-rhamnose (TDP-Rha) into  $\alpha$ -  
45 rhamnosyl-arginine when attached to EF-P.<sup>24-25</sup> Compared to the common and relatively well  
46 understood asparagine glycosylation, sugar modifications on the guanidino group of arginine  
47 appeared to be rare and almost nothing is known about the molecular mechanism.<sup>26-27</sup> Beside EF-P  
48 arginine-glycosylation, to date there are only two further reported cases: The first one described self  
49  $\beta$ -glycosylation of sweet corn amylogenin.<sup>28</sup> In the second case an effector glycosyltransferase  
50 termed NleB of enteropathogenic *E. coli* (EPEC) was shown to inactivate human cell death-domain-  
51 containing proteins by N-acetylglucosaminylation of arginine and with this being a major pathogenicity  
52 determinant during infection.<sup>29-30</sup> Similarly, a lack of *earP* abolishes pathogenicity of *P. aeruginosa*.<sup>15</sup>  
53 Accordingly, solving the molecular mechanism of arginine rhamnosylation might pave the way to  
54 ultimately design and develop targeted inhibitors against EarP.  
55

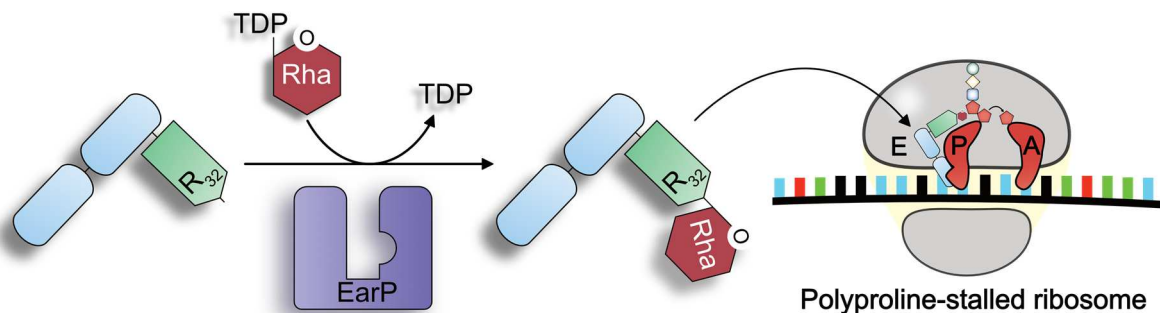

56

57 **Figure 1. Activation and molecular function of EarP-Arginine type translation elongation factor EF-P**

58 Left: The bacterial translation elongation factor EF-P is composed of two OB-Fold domains (light blue) and one KOW-like N-  
59 domain (light green). In about 10% of all bacteria EF-P is post-translationally activated by alpha-glycosylation of a strictly  
60 conserved arginine (R32). The glycosylation reaction is catalysed by the EF-P-arginine rhamnosyltransferase EarP using  
61 dTDP- $\beta$ -L-rhamnose (TDP-Rha) as a substrate. Right: Activated EF-P is recruited to polyproline stalled ribosomes and binds  
62 between the E and P site. Thereby R32<sup>EF-P</sup> and the attached rhamnose moiety presumably stabilize the CCA-end of the P-site  
63 prolyl-tRNA which in turn stimulates Pro-Pro peptide bond formation and thus alleviates the translational arrest.  
64

64

65 Here we present the X-ray crystal structure of EarP from *Pseudomonas putida* KT2440 (EarP<sub>Ppu</sub>)  
66 bound to its cognate nucleotide-sugar donor substrate TDP-Rha at 2.9 Å resolution (PDB: XXXX).  
67 Together with NMR spectroscopy analyses and an *in vitro* / *in vivo* biochemical enzyme  
68 characterization, we provide first insights into the mechanism of arginine glycosylation mediated by  
69 EarP and thus lay the foundation to understand this yet poorly characterized catalysis.

## 70 RESULTS

71 Despite low sequence conservation most nucleotide sugar dependent (Leloir-type)  
72 glycosyltransferases adopt one of two major folding patterns, GT-A or GT-B.<sup>26</sup> However, so far there  
73 is no available information on the structure and folding properties of EarP. We used SWISS MODEL<sup>31</sup>,  
74 Phyre<sup>2 32</sup> and the I-TASSER server<sup>33-35</sup> for protein structure and function predictions to generate fold  
75 recognition models of EarP from *Pseudomonas putida* (Figure S1). These predictions suggested the  
76 UDP-N-acetylglucosamine dependent glycosyltransferases MurG from *E. coli* (MurG<sub>Eco</sub>)<sup>36</sup> and OGT  
77 from *Xanthomonas campestris* (OGT<sub>Xca</sub>)<sup>37</sup> as structural orthologues. Accordingly, EarP<sub>Ppu</sub> adopts a  
78 clamp-like structure with two opposing Rossmann-like domains that are separated by an inter-domain  
79 cleft (Figure S1) and with this the protein is presumably a GT-B type glycosyltransferase.<sup>26</sup>

### 80 Structure of *Pseudomonas putida* EarP

81 We were able to subsequently confirm the GT-B fold by having solved the crystal structure of  
82 EarP<sub>Ppu</sub> at 2.9 Å resolution (Figure 2A). Indeed, the EarP<sub>Ppu</sub> C-domain - being very well resolved -  
83 includes the residues 184-360 and follows the Rossmann-fold topology with five β-strands (β8-β12)  
84 and seven α-helices (α7-α13, Figure 2B). On the other hand, the N-domain (aa 1-153 and 361-377)  
85 could only be resolved partly. In the modelled structure, the N-domain features a central β-sheet of  
86 seven β-strands (β1-β7), surrounded by five α-helices (α1-α4 and α14) (Figure S1, Figure 2B). In the  
87 crystal structure, only β-strands β1, β2, and β3 as well as α-helix α1 and α14 are resolved (Figure 2A).  
88 Although, very weak electron density for likely other regions could be noticed, it was not possible to  
89 trace the protein sequence due to low resolution and lack of connectivity with the rest of the protein  
90 molecule. This weak and discontinuous electron density in several parts of the N-domain suggests  
91 that these parts are mobile and could provide an explanation for a higher than usual R-free (37.4%)  
92 value at this resolution. In addition, the mobility of the N-domain is further supported by higher  
93 average B-factors for this domain compared to the C-domain (61 Å<sup>2</sup> vs 46 Å<sup>2</sup>; see Figure S2 for B-  
94 factors mapped onto the protein structure). However, we were able to confirm the presence of the  
95 predicted remaining strands and helices and thus the validity of the model and crystal structure by  
96 NMR secondary chemical shifts (Figure 2C). A prerequisite for this analysis is the backbone chemical  
97 shift assignment by triple resonance NMR experiments. The relatively large size of EarP<sub>Ppu</sub> with 43  
98 kDa exceeds the sensitivity limitations of NMR demanding for deuteration in order to decrease cross-  
99 relaxation effects and to decrease the signal linewidth. Nonetheless, coupled with TROSY-based  
100 experiments we were able to assign 62 % of the EarP<sub>Ppu</sub> backbone.

101 The two domains are interconnected by a bipartite helix (α5, α6) comprising aa 157-176. This  
102 linker region together with an unstructured segment that positions α14 in the vicinity of the N-terminus  
103 defines the floor of the cleft that separates the domains.  
104

105

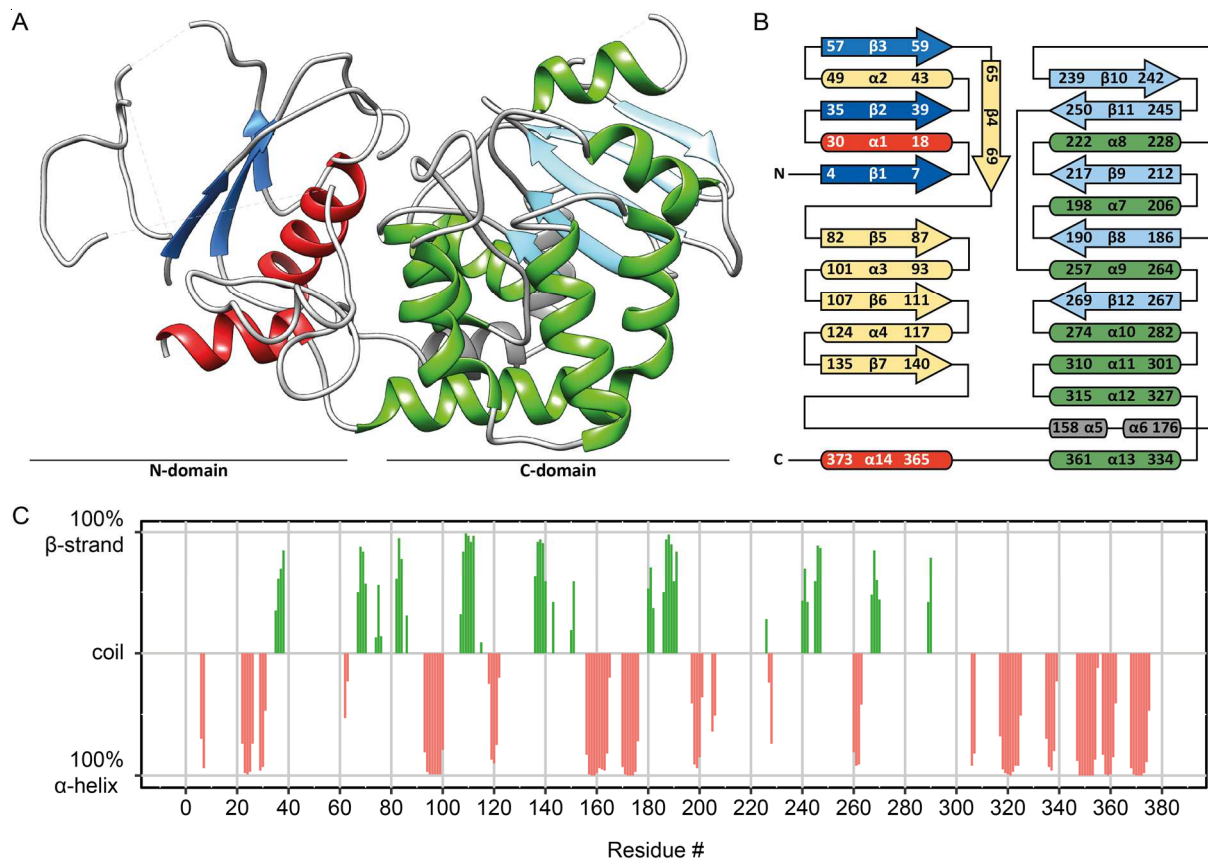

106

107

**Figure 2. EarP folding pattern and topology.**

108

109

110

111

112

113

114

115

(**A**) Ribbon representation of the 2.9 Å crystal structure of EarP<sub>Ppu</sub>. Illustration was generated with UCSF Chimera.<sup>38</sup> (**B**) Topology diagram of EarP based on the EarP<sub>Ppu</sub> crystal structure, NMR analysis and predictions by MINNOU.<sup>39</sup> Secondary structure elements are shown, with α-helices in red and green for the N- and C-domains, respectively, and β-strands correspondingly in blue and cyan. The bipartite helix of the linker domain is coloured in grey. Helices and β-strands not resolved in the crystal structure are coloured in yellow. (**C**) Secondary structure of EarP. The secondary structure of individual amino acids is indicated as propensity to either form an α-helix (red) or β-strand (green). The amino acids with a propensity to adopt random coil or lacking information about secondary structure were assigned zero values in the plot. The propensity values were obtained from C<sub>α</sub>, C<sub>β</sub>, NH and H chemical shifts using TALOS+.<sup>40</sup>

116

### Analysis of the TDP-β-L-rhamnose binding site in the EarP C-domain

117

118

119

120

121

122

123

124

125

126

127

In Leloir-type GT-B glycosyltransferases the nucleotide-sugar binding site is canonically located in the protein C-domain.<sup>41</sup> Similarly, the TDP-Rha in the EarP<sub>Ppu</sub> crystal structure is located in an aromatic pocket that is composed of F191<sup>EarP</sup>, F252<sup>EarP</sup> and F258<sup>EarP</sup>, surrounding the dTDP moiety, and Y193<sup>EarP</sup> and Y291<sup>EarP</sup> on the rhamnose side of the ligand (Figure 3A, Figure S3). The aromatic ring of F252<sup>EarP</sup> establishes π-stacking with the thymine nucleobase and the ring of F258<sup>EarP</sup> stacks on the ribose. F191<sup>EarP</sup> forms a lid on top of the thymine-ribose part. The hydroxyl group at C3' of the rhamnose is in hydrogen bonding distance with the hydroxyl group of Y193<sup>EarP</sup> and the aromatic pocket is closed on the rhamnose side by Y291<sup>EarP</sup>. R271<sup>EarP</sup> forms a hydrogen bond via its guanidino amide bond with the hydroxyl group at C2' of rhamnose. The binding is further strengthened by side chain interactions of Q255<sup>EarP</sup>, D274<sup>EarP</sup> and S275<sup>EarP</sup>, forming a hydrogen bond network with the pyrophosphate group.



128 To validate the amino acids involved in coordinating the donor substrate in solution, we  
129 performed NMR structural analyses including titrations with TDP-Rha. Upon titration with TDP-Rha,  
130 clear chemical shift perturbations could be observed, confirming that TDP-Rha binds to EarP at  
131 expected residues (Figure 7).

A

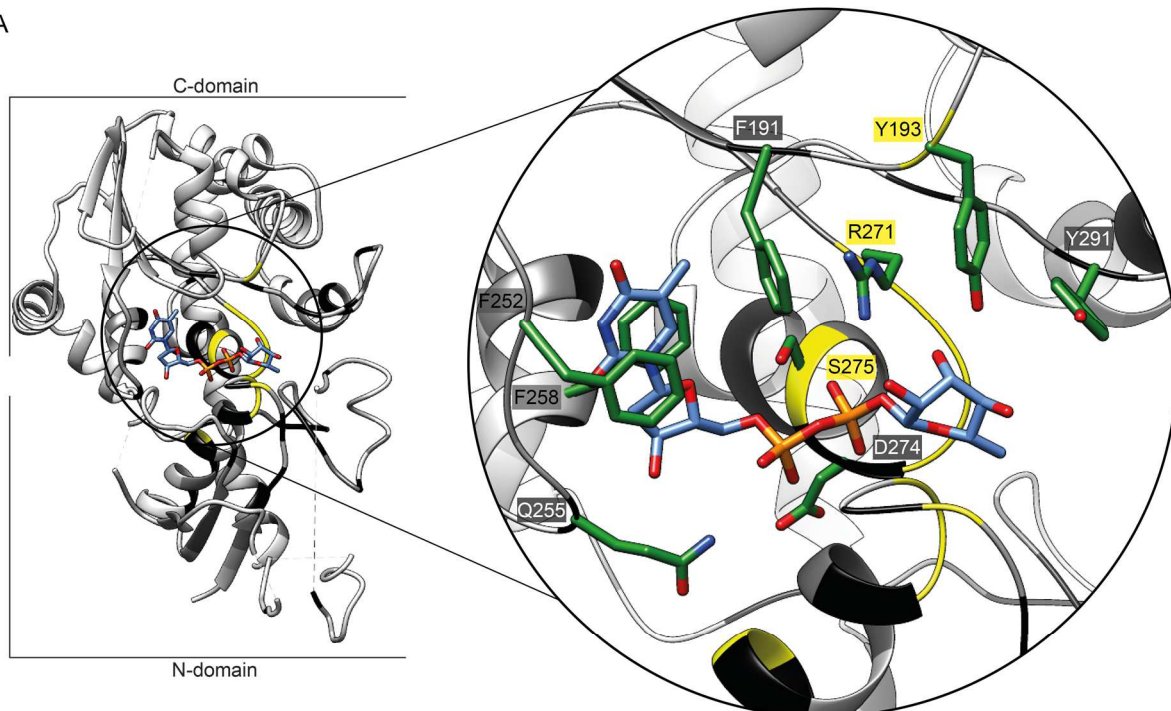

B

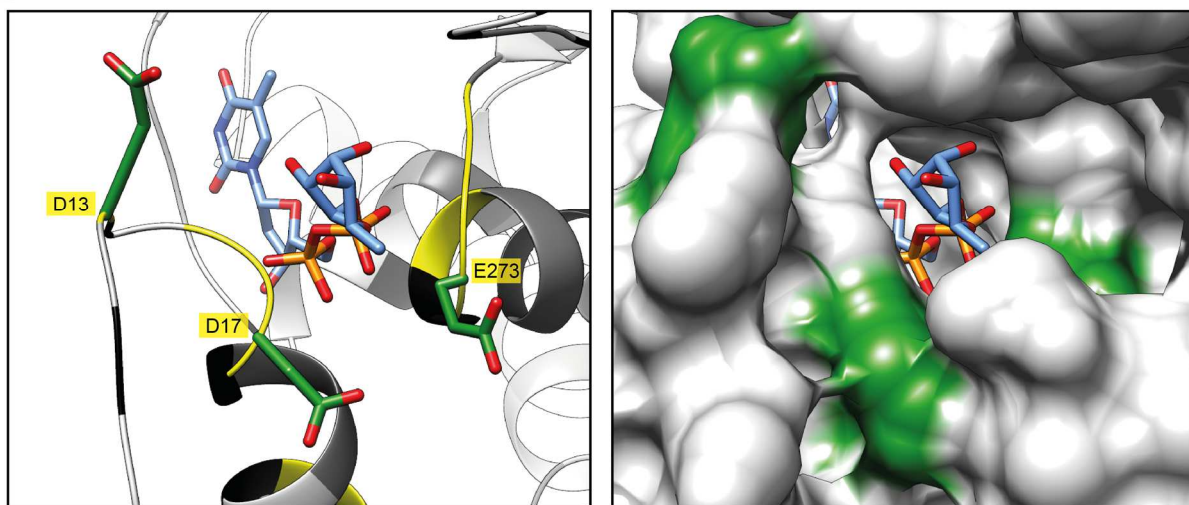

132  
133

**Figure 3. The EarP TDP- $\beta$ -L-rhamnose binding site.**

134 (A) Left: Three-dimensional structure of EarP<sub>Ppu</sub> in ribbon representation. The TDP-Rha binding pocket in the C-domain is  
135 circled in black. Right: Zoom into the nucleotide-sugar binding pocket with bound TDP-Rha. Important residues for TDP-Rha  
136 positioning are depicted as green sticks and labelled with single letter-code identifiers. (B) Left: Ribbon representation of the  
137 nucleotide-sugar binding pocket with stick representation of the bound TDP-Rha (blue) as well as the three invariant residues  
138 D13, D17 and E273 (green) that are presumably involved in catalysis. Right: Surface representation of the nucleotide-sugar  
139 binding pocket with stick representation of the bound TDP-Rha (blue), illustrating the closed state of the aromatic pocket in the  
140 bound state. D13, D17 and E273 are coloured in green. Backbone residues are colour coded in the ribbon representations  
141 according to their degree of conservation: yellow 100%, black  $\geq 95\%$ , dark grey  $\geq 90\%$ , light grey  $\geq 50\%$  and white  $< 50\%$  identical  
142 residues in all analysed EarP orthologues. Electron density for TDP-Rha bound to EarP is shown in Figure S3. All illustrations  
143 were generated with UCSF Chimera.<sup>38</sup>

144 In parallel, small-angle X-ray scattering (SAXS) of free EarP<sub>Ppu</sub> and bound to TDP-Rha has  
145 been performed (Figure S4). The overall shape of the molecule could be validated to be the same in  
146 solution. Furthermore, there are no large conformational changes (> 10 Å) or movements of both  
147 Rossmann fold domains with respect to each other upon binding of TDP-Rha as the scattering density  
148 does not change compared to the free state.

149 Database mining identified 432 EarP homologs representing about 10% of sequenced  
150 bacteria (Supplemental Dataset S1).<sup>15</sup> Phylogenetically EarP originated presumably in the  $\beta$ -  
151 proteobacteria subdivision and was horizontally transferred into the  $\gamma$ -proteobacterial orders of  
152 *Pseudomonadales*, *Aeromonadales* and *Alteromonadales*. It can also be found in certain  
153 *Fusobacteria*, *Planctomycetes* and *Spirochetes*.<sup>15</sup>

154 In order to identify conserved amino acids we used Clustal Omega<sup>42</sup> and generated a multiple  
155 sequence alignment (Figure 4A). We found 49 residues with a sequence conservation of  $\geq 95\%$ .  
156 Mapping of these residues onto the crystal structure, revealed an accumulation at or near the inter-  
157 domain cleft (Figure 4B, C) including the binding pocket for the nucleotide sugar donor substrate  
158 (Figure 3, Figure S3).

159 Together with the structural information, this enabled a rational mutational analysis in which  
160 selected EarP<sub>Ppu</sub> residues of the TDP-Rha binding site were exchanged by alanine (Figure 4A). This  
161 included F191<sup>EarP</sup>, Y193<sup>EarP</sup>, F252<sup>EarP</sup>, F258<sup>EarP</sup> and Y291<sup>EarP</sup> forming the aromatic pocket as well as  
162 Q255<sup>EarP</sup>, R271<sup>EarP</sup>, D274<sup>EarP</sup> and S275<sup>EarP</sup> being involved in hydrogen bond networking. The  
163 corresponding EarP<sub>Ppu</sub> substitutions variants were subjected to an *in vivo* functionality analysis (Figure  
164 5A, B).

165 Previously we could show that the heterologous expression of *efp* and *earP* from  
166 *S. oneidensis* in *E. coli* can fully complement for a lack of EF-P<sup>15</sup> with respect to the activation of the  
167 lysine dependent acid stress response by the transcriptional activator CadC.<sup>6</sup> Similarly, coproduction  
168 of wildtype EF-P<sub>Ppu</sub> and wildtype EarP<sub>Ppu</sub> (WT<sup>EarP</sup>) can restore wildtype  $\beta$ -galactosidase activity in an  
169 *E. coli* P<sub>cadBA::lacZ</sub>  $\Delta$ *efp* strain (Figure S5). Out of the nine tested EarP<sub>Ppu</sub> substitution variants we  
170 measured reduced  $\beta$ -galactosidase activities for F191A<sup>EarP</sup>, Y193A<sup>EarP</sup>, R271A<sup>EarP</sup>, S275A<sup>EarP</sup>,  
171 Y291A<sup>EarP</sup> (Figure 5B). Thereby, R271A<sup>EarP</sup> and Y291A<sup>EarP</sup> failed to induce  $\beta$ -galactosidase expression  
172 at all.

173 In parallel the enzymatic activity of EarP<sub>Ppu</sub> was investigated *in vitro* employing an  $\alpha$ Arg<sup>Rha</sup>  
174 antibody. The antibody was raised against a chemically synthesized glycopeptide antigen  
175 (SGR<sup>Rha</sup>NAAIVK) and specifically detects arginine rhamnosylation (see material and method section)  
176 (Figure S6). This in turn enabled the quantification of rhamnosylation levels of EF-P<sub>Ppu</sub> over time by  
177 Western Blot analysis (Figure 5B, C, D). In a first step K<sub>m</sub> and k<sub>cat</sub> of WT<sup>EarP</sup> were determined to be 53  
178  $\mu$ M and 35 min<sup>-1</sup>, respectively (Figure 5B, D).

179 We wondered whether this K<sub>m</sub> makes physiologically sense and therefore analysed the  
180 cellular TDP-Rha levels in *P. putida*, *P. aeruginosa* and *E. coli*, which were 3.5 mM, 2.0 mM and 4.0  
181 mM, respectively (see material & method section, Figure S7). In good accordance with our  
182 measurements in *Lactococcus lactis*, the physiological TDP-Rha concentration was previously

183 determined to be as high as 1 mM.<sup>44</sup> Thus, within a bacterial cell the donor substrate reaches  
 184 saturating concentrations according to the WT<sup>EarP</sup> K<sub>m</sub> measurements.  
 185

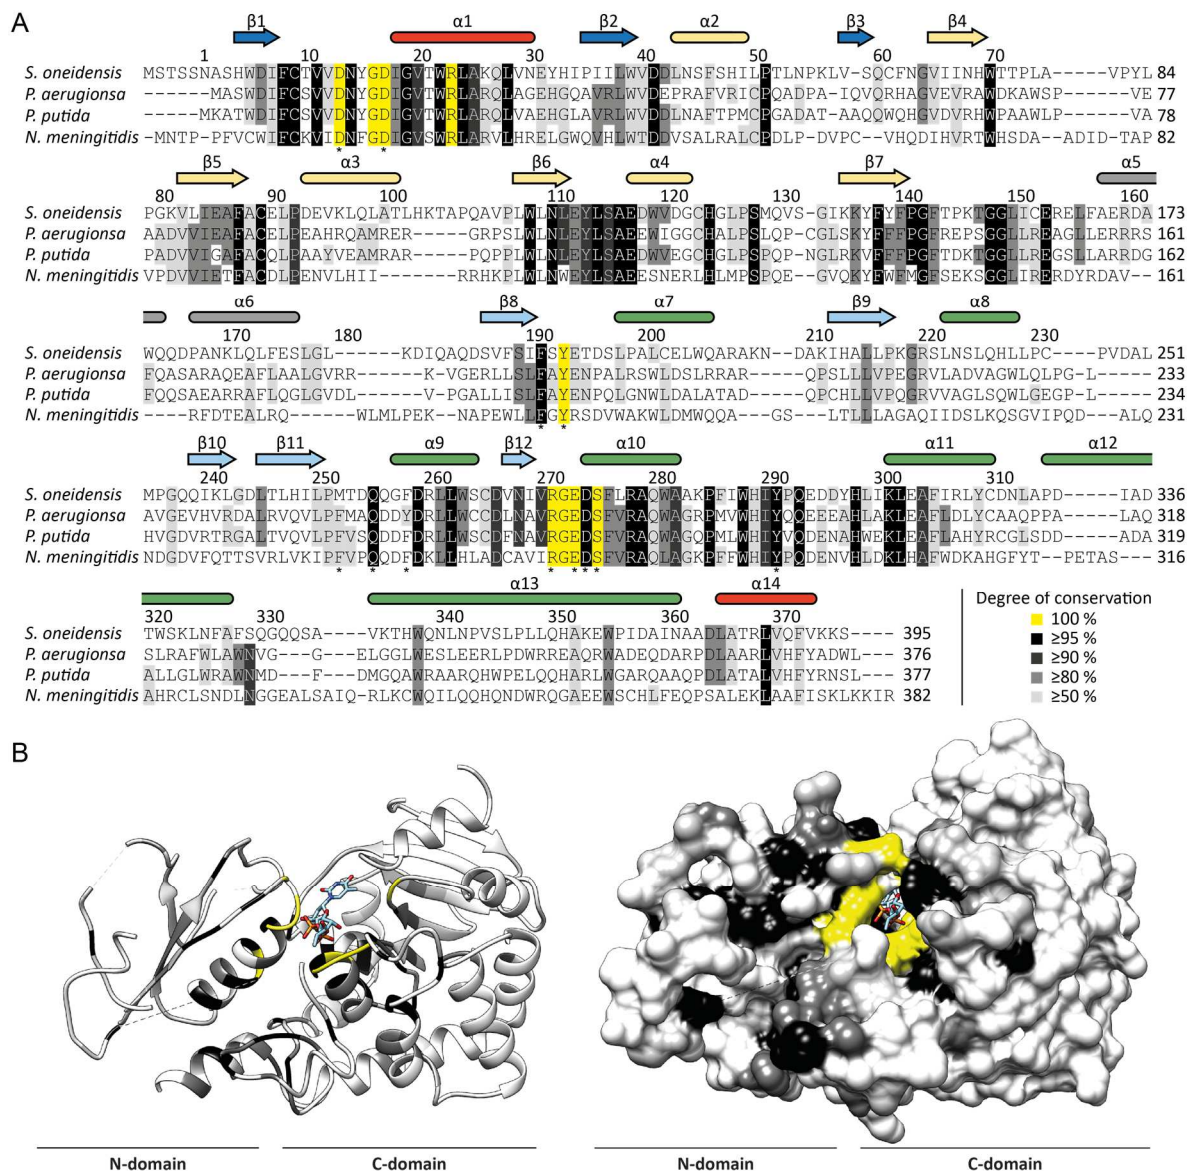

**Figure 4. Evolutionary conservation of amino acids in EarP homologs.**

186  
 187  
 188 **(A)** Multiple sequence alignment of EarP from *Shewanella oneidensis*, *P. aeruginosa*, *P. putida* and *N. meningitides* as a  
 189 selection from the alignment of 432 protein sequences that were collected from the NCBI database (Supplemental Dataset S1).  
 190 The multiple sequence alignment was generated using Clustal Omega<sup>43</sup>. Secondary structure elements of EarP are shown with  
 191 the same colour code as in Figure 2. Amino acids selected for mutational analysis are indicated by asterisks. **(B)** The EarP<sub>Ppu</sub>  
 192 crystal structure was coloured according to the degree of conservation of the respective aa. Ribbon (left) and surface (right)  
 193 representation of the EarP<sub>Ppu</sub> crystal structure. Residues colour code: yellow 100%, black ≥95%, dark grey ≥90%, light grey ≥80%  
 194 and white <50% identical residues in all analysed EarP orthologues. Illustrations were generated with UCSF Chimera.<sup>38</sup>  
 195

196 Next, K<sub>m</sub> and K<sub>cat</sub> of EarP<sub>Ppu</sub> substitution variants were determined and compared to those of  
 197 the wildtype protein. Strikingly, all mutations affected enzymatic activity (Figure 5B, Figure S8).  
 198 Depending on the substituted residue the K<sub>m</sub> increased up to 60fold for F252A<sup>EarP</sup> (K<sub>m</sub>=3.4 mM).



199 Conversely,  $k_{cat}$  decreased up to 35 times when measuring the kinetics of F191A<sup>EarP</sup> and Y193A<sup>EarP</sup>,  
 200 respectively.

201 To exclude that decreased enzyme activity was due to fold disruption, selected EarP<sub>Ppu</sub>  
 202 variants (F191A<sup>EarP</sup>, Y193A<sup>EarP</sup>, R271A<sup>EarP</sup>, D274A<sup>EarP</sup> and Y291A<sup>EarP</sup>) were analysed by NMR <sup>1</sup>H-<sup>15</sup>N-  
 203 HSQC experiments (Figure S9). All tested substitution variants showed no structural alterations to the  
 204 wildtype protein, except for D274A<sup>EarP</sup>. Accordingly, misfolding contributes to the altered enzymatic  
 205 activity of this protein variant *in vitro*.

206 Altogether, the *in vivo* and *in vitro* measurements of EarP<sub>Ppu</sub> enzymatic activity complement  
 207 and validate the structural analysis of the TDP-Rha binding pocket.

208

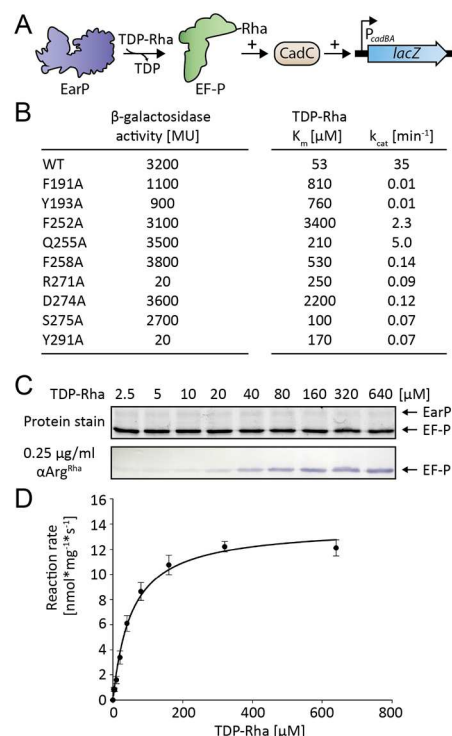

209

210 **Figure 5. Analysis of kinetic parameters and *in vivo* activity of EarP<sub>Ppu</sub> variants.**

211 **(A)** Molecular principle of the *in vivo* EF-P<sub>Ppu</sub> functionality assay. This assay is based on the lysine decarboxylase acid stress  
 212 response of *E. coli* the CadABC module. At low pH and the concomitant presence of lysine the transcriptional activator CadC  
 213 activates the promoter of its two downstream genes  $P_{cadBA}$  and with this induces expression of *lacZ* in an *E. coli* MG1655  
 214  $P_{cadBA}::lacZ$  strain. Proper translation of CadC is dependent on the presence of EF-P<sub>Ppu</sub> and its corresponding modification  
 215 system EarP<sub>Ppu</sub> and thus  $\beta$ -galactosidase activity is a direct read out for EF-P and EarP functionality, respectively. **(B)** *In vivo*  
 216 activities and kinetic parameters of tested single amino acid exchange variants of EarP<sub>Ppu</sub>. Left: *In vivo* EarP<sub>Ppu</sub> activities were  
 217 determined by measuring the  $\beta$ -galactosidase activities of an *E. coli* MG1655  $P_{cadBA}::lacZ \Delta efp$  heterologously expressing *efp*<sub>Ppu</sub>  
 218 together with *earP*<sub>Ppu</sub> wildtype or mutants from o/n cultures in LB pH 5.8. Background corrected mean values of three  
 219 independent measurements are shown. Standard deviations were determined from three independent experiments to be  $\leq 10\%$ ;  
 220 Right:  $K_m$  and  $k_{cat}$  of wildtype EarP<sub>Ppu</sub> (WT<sup>EarP</sup>) and single amino acid substitution variants. Standard errors were determined by  
 221 SigmaPlot to be  $< 20\%$ . **(C)** Top: TCE protein stain<sup>45</sup> of a representative SDS-gel used for determination of kinetic parameters.  
 222 Fixed amounts of EF-P<sub>Ppu</sub> (0.25  $\mu$ M) and WT<sup>EarP</sup> (0.1  $\mu$ M) were incubated with varying concentrations of TDP-Rha for 20 s and  
 223 subjected to SDS-PAGE. Bottom: Detection of rhamnosylated EF-P<sub>Ppu</sub>. EF-P<sub>Ppu</sub> was visualized after Western Blotting using  
 224 0.25  $\mu$ g/ml  $\alpha$ Arg<sup>Rha</sup>. **(D)** TDP-Rha saturation curve of WT<sup>EarP</sup>. Band intensities of (C) were quantified using ImageJ.<sup>46</sup> Reaction  
 225 rates were calculated as mean from four independent measurements. Standard deviations are shown as error bars for each  
 226 concentration.



227 **The KOW-like EF-P N-domain is sufficient for EarP mediated rhamnosylation**

228

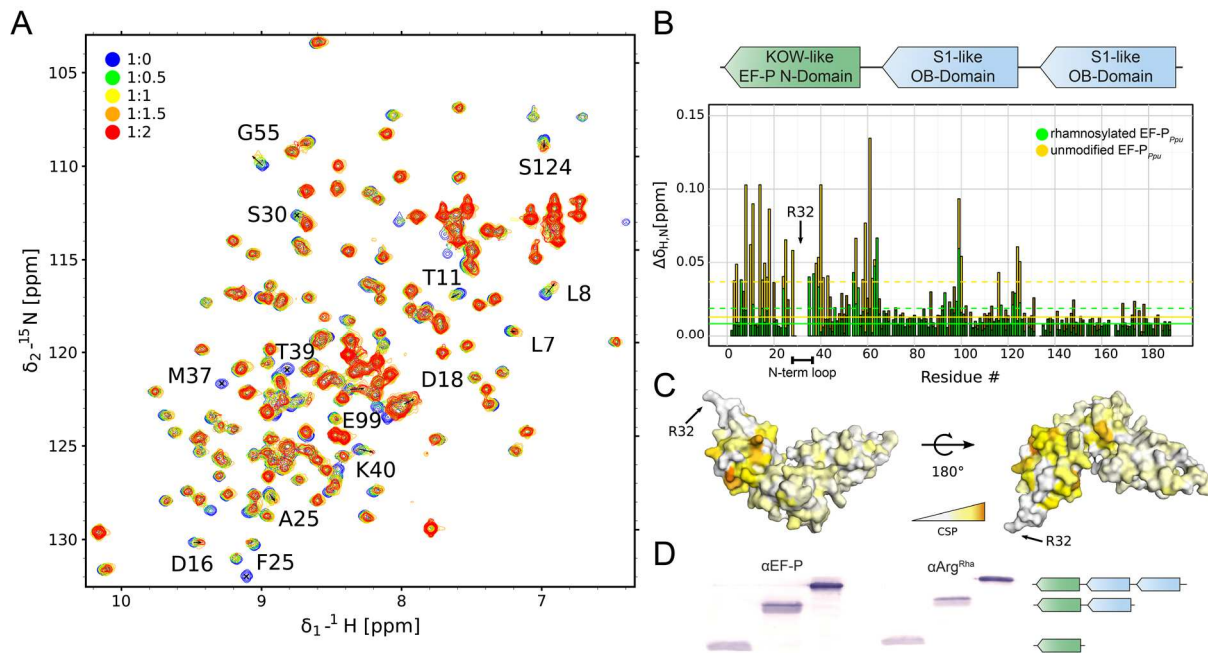

229

230 **Figure 6. Interaction of EF-P<sub>Ppu</sub> with EarP<sub>Ppu</sub>.**

231 (A) NMR titration of unmodified EF-P<sub>Ppu</sub> titrated by EarP<sub>Ppu</sub>. Overlay of <sup>1</sup>H-<sup>15</sup>N HSQC spectra of EF-P recorded at different  
 232 titration steps. EF-P was titrated to 1:2 EF-P<sub>Ppu</sub>:EarP<sub>Ppu</sub> molar ratio. Colour coding for respective titration steps is indicated in  
 233 the upper left corner. Examples of peaks with high chemical shift perturbations (CSPs) or severe line-broadening are shown by  
 234 labels indicating the assignment of given peak. (B) Top) Domain structure of EF-P. EF-P consists of three β-barrel domains.  
 235 The KOW-like EF-P N-domain harbors the rhamnosylation target R32<sup>EF-P</sup>. Bottom) CSPs of EF-P<sub>Ppu</sub> titrated by EarP<sub>Ppu</sub> derived  
 236 from A). Unmodified and rhamnosylated EF-P<sub>Ppu</sub> were titrated by EarP<sub>Ppu</sub> to 1:2 EF-P<sub>Ppu</sub>:EarP<sub>Ppu</sub> molar ratio. To analyse the  
 237 interaction, CSPs were calculated as described in the methods section and plotted against residue numbers. Colour coding is  
 238 indicated in the upper right corner. Full lines indicate median CSP, dashed lines indicate median CSP plus standard deviation  
 239 and residues with CSPs higher than median plus standard deviation are shown in a brighter shade of respective colours. The  
 240 N-terminal loop containing rhamnosylation target R32<sup>EF-P</sup> is indicated below the plot. (C) CSPs of unmodified EF-P<sub>Ppu</sub> titrated by  
 241 EarP<sub>Ppu</sub> plotted on the model of EF-P from *P. aeruginosa*<sup>47</sup> (PDB ID: 3OYY) using a white-orange gradient, where white  
 242 represents the weakest CSP and orange indicates the strongest CSP. The position of R32<sup>EF-P</sup> is indicated. (D) Rhamnosylation  
 243 experiments using full length EF-P<sub>Ppu</sub> and C-terminally truncated variants (EF-P<sub>Ppu</sub> 1-128, EF-P<sub>Ppu</sub> 1-65). Rhamnosylation of  
 244 purified protein was detected using 0.25 μg/ml αArg<sup>Rha</sup>. The domain structure of the respective protein variants is indicated as in  
 245 (B).

246

247 To test which part of EF-P is involved in the interaction with EarP, NMR chemical shift  
 248 perturbation experiments were performed by comparing <sup>1</sup>H-<sup>15</sup>N-HSQC between unbound EF-P<sub>Ppu</sub> and  
 249 EarP<sub>Ppu</sub>-bound EF-P<sub>Ppu</sub> (Figure 6A). Triple resonance experiments of EF-P<sub>Ppu</sub> enabled backbone  
 250 assignment with a sequence coverage of 97 %. Missing assignments are for residues S123, R133,  
 251 N140, V164, D175 and G185. The assignment enabled also secondary structure determination from  
 252 secondary chemical shifts and confirmed the validity of the EF-P model for *P. putida*, based on the  
 253 crystal structure of *P. aeruginosa* EF-P<sup>47</sup> (Figure S10). The titration experiment showed clear  
 254 chemical shift perturbations in the N-terminal acceptor domain of EF-P<sub>Ppu</sub> (Figure 6B). However,  
 255 R32<sup>EF-P</sup> and residues surrounding the rhamnosylation site (e.g. S30<sup>EF-P</sup>, G31<sup>EF-P</sup>, R32<sup>EF-P</sup>, N33<sup>EF-P</sup>) are

256 severely line broadened beyond detection. Therefore, chemical shift perturbation values cannot be  
257 determined for these and vicinal residues. This line broadening is an indication that they are bound by  
258 EarP<sub>Ppu</sub> and thus have rotational correlation times expected for a complex of that size. Several  
259 residues located in the S1-like OB domain are also slightly affected. However, this is not necessarily  
260 due to direct contacts with EarP<sub>Ppu</sub> but could also be propagating effects. Therefore, we also  
261 investigated *in vivo* and *in vitro* rhamnosylation of truncated EF-P<sub>Ppu</sub> variants comprising either amino  
262 acids 1-128 and 1-65, respectively (Figure 6D). Both truncations were readily rhamnosylated by  
263 EarP<sub>Ppu</sub> further corroborating that EF-P contact sites are predominantly located in the KOW-like N-  
264 domain.

265 In addition, we compared NMR interactions between EarP<sub>Ppu</sub> and unmodified EF-P<sub>Ppu</sub> or  
266 rhamnosylated EF-P<sub>Ppu</sub>, respectively. This experiment clearly showed that chemical shift perturbations  
267 for unmodified EF-P are stronger than for rhamnosylated EF-P (Figure 6B). Thus, EarP releases EF-P  
268 after rhamnosylation due to decreased affinity, while unmodified EF-P binds with higher affinity to  
269 enable efficient post-translational modification.

### 270 **D13, D17 and E273 are involved in catalysis to activate the acceptor substrate EF-P**

271 We and others previously showed that EarP inverts the anomeric configuration on the sugar  
272 moiety from TDP-β-L-rhamnose to α-rhamnosyl arginine.<sup>24-25</sup> Reportedly, inverting  
273 glycosyltransferases employ a direct displacement S<sub>N</sub>2-like reaction.<sup>48</sup> The molecular basis for  
274 inverted N-linked glycosylation was elucidated for the oligosaccharyl transferase PglB.<sup>49</sup> Here the  
275 catalytic site features three acidic side chains.<sup>27</sup> Analogously to PglB, three negatively charged  
276 residues - aspartates D13<sup>EarP</sup>, D17<sup>EarP</sup> and glutamate E273<sup>EarP</sup> - were identified as candidates to  
277 catalyze the glycosylation reaction (Figure 2B). All three residues are strictly conserved in all EarP  
278 orthologues (Figure 4A, Supplemental Dataset S1). Moreover, D17<sup>EarP</sup> as well as E273<sup>EarP</sup> are  
279 located in proximity to the putative active center for (Figure 3b). Consequently, we constructed the  
280 corresponding alanine substitution variants D13A<sup>EarP</sup> D17A<sup>EarP</sup> and E273A<sup>EarP</sup> and investigated the  
281 enzymatic activity *in vitro*. In line with the idea that these residues might be involved in catalysis, EF-P  
282 rhamnosylation could not be detected even after 8h of incubation and accordingly these EarP  
283 variants are inactive (Figure S11). To further confirm our hypothesis, D13A<sup>EarP</sup>, D17A<sup>EarP</sup> and E273A<sup>EarP</sup> were  
284 investigated on activation of EF-P<sub>Ppu</sub> *in vivo*. Expectedly, coproduction of D13A<sup>EarP</sup>, D17A<sup>EarP</sup> and  
285 E273A<sup>EarP</sup> with EF-P<sub>Ppu</sub> phenocopies *Δefp* with respect to P<sub>cadBA</sub> activation (Figure 7A; Figure S5) and  
286 thus further corroborates our findings from the *in vitro* analysis.

287 To exclude misfolding being causative for the non-functional EarP<sub>Ppu</sub> substitution variants,  
288 <sup>15</sup>N-HSQC experiments were performed on D13A<sup>EarP</sup> and D17A<sup>EarP</sup>, both part of the highly flexible N-  
289 domain (Figure 3b). The spectra show no structural alterations compared to WT<sup>EarP</sup> (Figure 7B and  
290 7C). Additionally, D13A<sup>EarP</sup> and D17A<sup>EarP</sup> were titrated with TDP-Rha and are indistinguishable from  
291 WT<sup>EarP</sup> perturbations. Therefore, it can be concluded that donor substrate binding is unaffected.  
292 Interestingly, although D13<sup>EarP</sup> and D17<sup>EarP</sup> resonances could not be assigned, other residues in close  
293 proximity (G16<sup>EarP</sup> and G19<sup>EarP</sup>) exhibit strong perturbations not only in WT<sup>EarP</sup> but also in D13A<sup>EarP</sup>  
294 and D17A<sup>EarP</sup> upon TDP-Rha binding, despite not forming direct ligand contacts. This confirms not

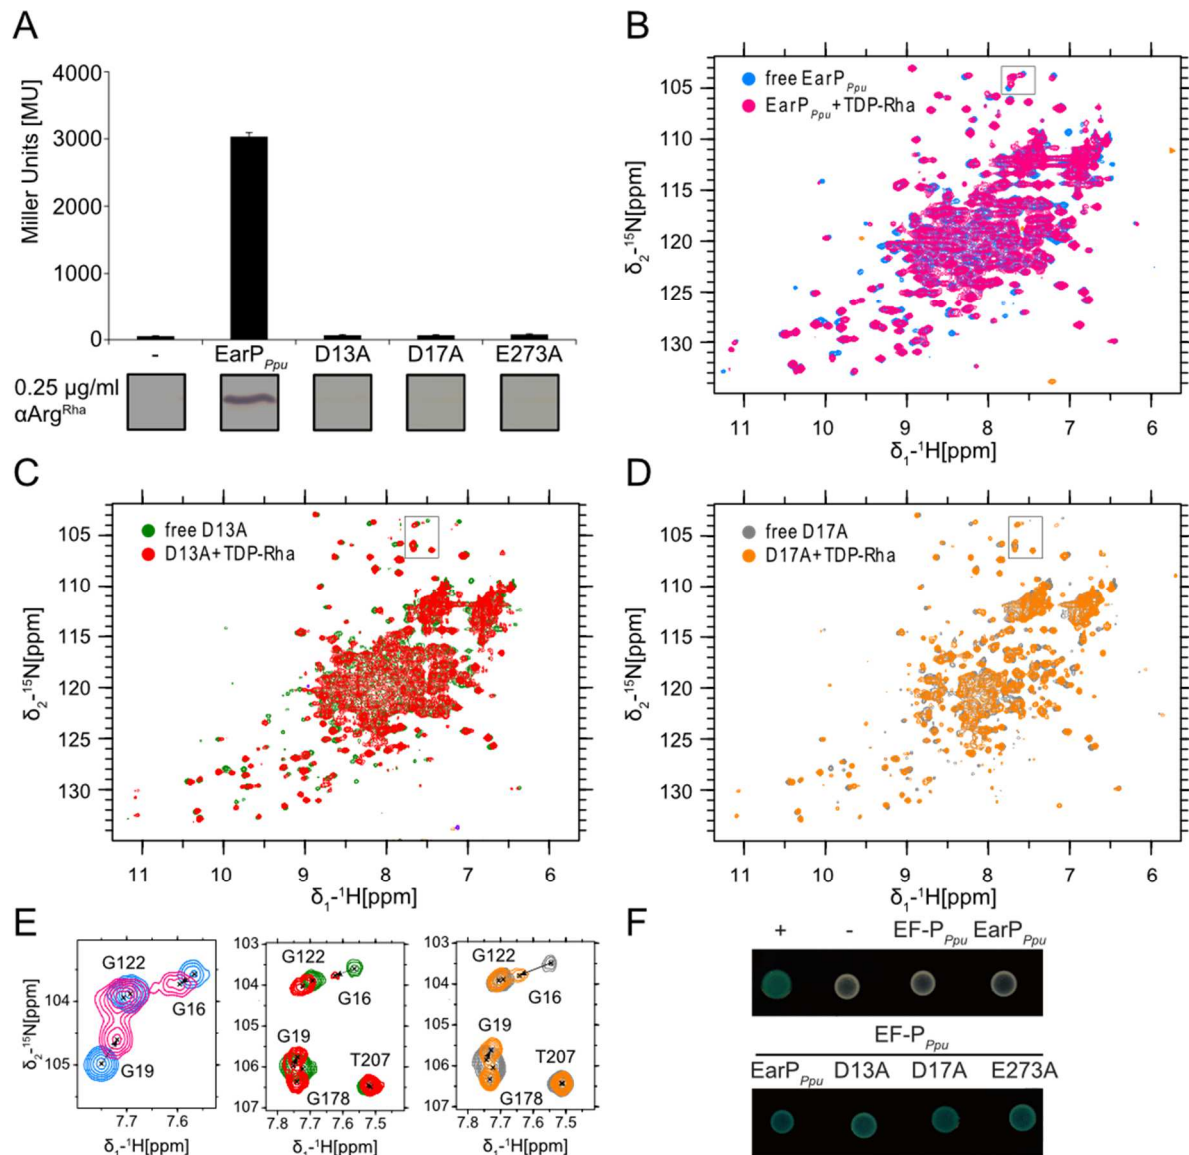

295  
 296 **Figure 7. Interaction of TDP-Rha with EarP.** (A) Top: Analysis of *in vivo* activity of WT<sup>EarP</sup>, D13A<sup>EarP</sup>, D17A<sup>EarP</sup> and E273A<sup>EarP</sup>.  
 297 *In vivo* EarP<sub>Ppu</sub> activities were determined by measuring the  $\beta$ -galactosidase activities of an *E. coli* MG1655 P<sub>cadBA</sub>::lacZ  $\Delta$ efp  
 298 heterologously expressing *efp*<sub>Ppu</sub> together with *earP*<sub>Ppu</sub> wildtype or mutants from o/n cultures in LB pH 5.8. Mean values of three  
 299 independent measurements are shown. Standard deviations from three independent experiments were determined to be  $\leq 10\%$   
 300 Bottom: Western Blot analysis of o/n cultures of *E. coli* MG1655 P<sub>cadBA</sub>::lacZ  $\Delta$ efp heterologously expressing *efp*<sub>Ppu</sub> together with  
 301 *earP*<sub>Ppu</sub> wildtype or mutants. Rhamnosylated EF-P<sub>Ppu</sub> (EF-P<sup>Rha</sup>) was detected by using 0.25  $\mu\text{g/ml}$   $\alpha\text{Arg}^{\text{Rha}}$  (B) Overlay of <sup>1</sup>H <sup>15</sup>N  
 302 HSQC spectra of free wild-type EarP and EarP bound to TDP-Rha. (C) Overlay of <sup>1</sup>H <sup>15</sup>N HSQC spectra of free and TDP-Rha-  
 303 bound D13A EarP variant. (D) Overlay of <sup>1</sup>H <sup>15</sup>N HSQC spectra of the free and TDP-Rha-bound D17A EarP variant. The colour  
 304 coding is indicated in the upper left corner of each spectrum. The titrations are described in details in the material and methods  
 305 section. (E) Zoom-in into the overlaid spectra shown in panels (A), (B) and (C). Position of the zoom-in is indicated by a black  
 306 frame in the respective original overlay. Peak assignments are shown. The movement of G16 and G19 upon TDP-Rha titration  
 307 is indicated by dashed arrows (F) Bacterial two-hybrid analysis of protein-protein interactions between WT<sup>EarP</sup>, D13A<sup>EarP</sup>,  
 308 D17A<sup>EarP</sup> and E273A<sup>EarP</sup> and the protein acceptor EF-P<sub>Ppu</sub> in *E. coli* BTH101. The blue colour of colonies results from cleavage  
 309 of X-Gal by  $\beta$ -galactosidase and indicates protein-protein interaction between co-expressed hybrids.

310  
 311 only that these mutations do not affect donor substrate binding, but that this region of EarP<sub>Ppu</sub> is also  
 312 structurally altered upon binding, possibly preparing for efficient EF-P binding (Figure 7D). In parallel,  
 313 a bacterial two hybrid analysis<sup>50</sup> was set up to investigate interactions between EF-P<sub>Ppu</sub> and WT<sup>EarP</sup> as

314 well as D13A<sup>EarP</sup>, D17A<sup>EarP</sup> and E273A<sup>EarP</sup>. Therefore, fusions were generated with two  
315 complementary fragments, T25 and T18, encoding segments of the catalytic domain of the *Bordetella*  
316 *pertussis* adenylate cyclase CyaA. If EF-P<sub>Ppu</sub> and WT<sup>EarP</sup> do interact, then CyaA is reconstituted,  
317 which in turn allows induction of the *lac* promoter and results in *lacZ* expression. Accordingly, the  
318 interaction can be visualized by a blue colour of the colony on X-Gal containing plates. Indeed, such  
319 blue colonies were not only found when co-producing EF-P<sub>Ppu</sub> with WT<sup>EarP</sup> but also with the derivatives  
320 D13A<sup>EarP</sup>, D17A<sup>EarP</sup> and E273A<sup>EarP</sup> (Figure 7G). In comparison; when producing either WT<sup>EarP</sup> or EF-  
321 P<sub>Ppu</sub> together with the corresponding CyaA fragment solely, then the colony remains white (Figure  
322 7G), excluding unspecific interactions.

323 Thus, altogether these results strongly indicate that D13A<sup>EarP</sup>, D17A<sup>EarP</sup> and E273A<sup>EarP</sup> are  
324 directly or indirectly involved in activation of the acceptor guanidine group of R32<sup>EF-P</sup>.

## 325 DISCUSSION

326 Activation of the proline-specific translation elongation factors EF-P and IF-5A is usually achieved by  
327 post-translational elongations of the  $\epsilon$ -amino group of a conserved lysine.<sup>18-21, 51-52</sup> The resultant non-  
328 canonical amino acids –  $\beta$ -lysinyloxylysine, hypusine and 5-amino-pentanoyl-lysine – appear to  
329 be chemically and structurally analogous. We recently showed that in a subset of bacteria a so far  
330 unappreciated form of post-translational modification plays an important role in the activation of EF-P.  
331 Here, instead of lysine the guanidine group of a conserved arginine is modified with a rhamnose  
332 moiety by a glycosyltransferase termed EarP.<sup>15</sup> This type of modification does not only contrast with  
333 the other known EF-P/IF-5A activation strategies but is also one of only two reported cases of enzyme  
334 mediated arginine glycosylation. In the canonical N-linked glycosylation, the sugar is attached to the  
335 amide nitrogen of an asparagine in an N-X-S/T consensus sequence (X is any amino acid except for  
336 a proline).<sup>48, 53</sup> Unlike, the effector glycosyltransferase NleB of enteropathogenic *E. coli* N-acetyl-  
337 glucosaminylates (GlcNAc) modifies specifically the arginines R117 and R235 in the death-domain-  
338 containing proteins FADD and TRADD, respectively.<sup>29-30</sup> This in turn antagonizes apoptosis of  
339 infected cells thereby blocking a major antimicrobial host response. Notably, EarP neither shows  
340 sequential nor structural homologies to NleB and thus the arginine glycosylation of death-domains  
341 and EF-P, respectively, are examples of convergent evolution. Accordingly, one can assume that the  
342 molecular mechanisms of the glycosyl transfer reactions differ. In 2016 Wong Fok Lung and co-  
343 workers mutated *nleB* and identified certain residues in NleB either interfering with FADD binding or  
344 preventing GlcNAcylation.<sup>54</sup> Among the non-functional NleB protein variants they confirmed the  
345 importance of two invariant aspartate residues D221 and D223.<sup>30</sup> A catalytic Asp-X-Asp motif is  
346 featured by various GT-A glycosyltransferases. Here, the two negatively charged aspartate side  
347 chains coordinate a divalent cation that acts as a Lewis acid to facilitate the nucleotide leaving group  
348 departure. Negatively charged amino acids also play important catalytic roles in inverting GT-B  
349 glycosyltransferases.<sup>48</sup> In the case of the metal-independent fucosyltransferase FucT<sup>55</sup> for example,  
350 the side chain carboxyl groups of D13 and E95 could work as base catalysts.<sup>48</sup> Also the activation of  
351 the acceptor amide nitrogen by the lipid donor utilizing bacterial oligosaccharyltransferase PglB  
352 depends on the two negatively charged amino acids D56 and E319. These residues abolish the



353 conjugation of the nitrogen electrons and allow the positioning of a free electron pair for the  
354 nucleophilic attack onto the anomeric centre of the donor substrate.<sup>27, 49</sup> Analogously the three  
355 invariant negatively charged residues D13<sup>EarP</sup>, D17<sup>EarP</sup> and E273<sup>EarP</sup> in the EarP protein family might  
356 play a role in activating the R32 guanidino group of EF-P. Presumably, D17<sup>EarP</sup> and E273<sup>EarP</sup> - both  
357 being in close proximity to each other and the rhamnose moiety of TDP-Rha - form the catalytic dyad  
358 (Figure 2A). However, at this stage it cannot be excluded that D13<sup>EarP</sup> is also directly involved in  
359 catalysis after conformational rearrangements of the  $\beta$ 1- $\beta$ 2 loop upon EF-P binding.

360 While activation of the acceptor substrate could be driven by the essential amino acids  
361 D13<sup>EarP</sup>, D17<sup>EarP</sup> and E273<sup>EarP</sup> the nucleotide sugar donor TDP-Rha is bound in a highly conserved  
362 cavity of the protein C-domain. A co-crystal structure of the putative structural EarP analogue MurG<sub>Eco</sub>  
363 with its cognate substrate reveals that aromatic amino acid side chains play important roles in UDP  
364 binding.<sup>56</sup> Similar interactions were reported for the protein O-fucosyltransferase POFUT1, where  
365 F357 is involved in  $\pi$ -stacking with the respective nucleobase<sup>57</sup>. Stacking interactions also play a role  
366 in EarP where the aromatic side chains of F252<sup>EarP</sup> and F258<sup>EarP</sup> bind the thymine and ribose moiety  
367 of TDP-Rha, respectively. By contrast, contacts with the ribose or the phosphate moieties frequently  
368 occur via interactions with sidechain amines, hydroxyl groups and backbone amides<sup>36, 56-57</sup>.  
369 Accordingly, this is also the case for EarP.

370 In GT-B glycosyltransferases, positively charged amino acids are often involved in facilitating  
371 leaving group departure. This is achieved by neutralization of evolving negative charges on the  
372 phosphate moiety during the glycosyl transfer reaction as described e.g. for R261 of MurG<sub>Eco</sub>.<sup>36</sup>  
373 Notably, *earP*<sub>Ppu</sub> encodes an invariant R271<sup>EarP</sup> in the equivalent position and a substitution to  
374 R271A<sup>EarP</sup> strongly impairs protein function, altogether suggesting a similar role in product  
375 stabilization.

376 In GT-B glycosyltransferases the two Rossmann folds can be generally divided into one donor  
377 and one acceptor substrate binding domain.<sup>41</sup> Similar to other glycosyltransferases the nucleotide  
378 sugar is bound by the protein C-domain of EarP. Accordingly, it is worth assuming important binding  
379 sites for EF-P in the protein N-domain. Conversely, EF-P presumably contacts EarP by amino acids  
380 that are in close proximity to the glycosylation site R32<sup>EF-P</sup>. In agreement with this hypothesis the EF-  
381 P  $\beta$ -lysine ligase EpmA for example recognizes EF-P via identity elements in a region located around  
382 the *E. coli* EF-P modification site K34.<sup>19-20, 58</sup> Along the same line the deoxyhypusine synthase (DHS)  
383 can efficiently modify a human eIF-5A fragment comprising only the first 90 amino acids of the  
384 protein.<sup>59</sup> Similarly, we could show that the KOW-like N-terminal domain of EF-P (Figure 6D) is  
385 sufficient to be glycosylated by EarP being congruent with the NMR titrations of EF-P with EarP  
386 (Figure 6A, B). Upon titration with EarP the chemical shift perturbations observed were - with a few  
387 exceptions - restricted to the first 65 residues.

388 Taken together we propose a three-step model for the rhamnosylation of EF-P by its cognate  
389 modification system EarP (Figure 8). In the ground state both the nucleotide sugar binding site in the  
390 C-domain and the putative acceptor binding site in the N-domain are unoccupied. In the donor bound  
391 state TDP-Rha is coordinated within a highly conserved cavity in the protein C-Domain including an  
392 aromatic pocket that surrounds the thymine ring (Figure 3). Previous studies showed that, binding of

393 the donor substrate induces structural alterations in both the N- and C-domains of  
 394 glycosyltransferases.<sup>41, 60-61</sup> In MurG these rearrangements include rotation of F244 that stacks over  
 395 the nucleobase to cap the donor binding pocket.<sup>36</sup> Notably in the crystal structure of EarP a  
 396 phenylalanine F252 is in the equivalent position indicating that this capping interaction is conserved  
 397 (Figure 3C).<sup>56</sup> As mentioned above the structural alterations might not be restricted to the protein C-  
 398 Domain but can include an up to 20° rotation of the N-Domain to prone the glycosyltransferase for  
 399 catalysis.<sup>61</sup> This idea is also conceivable for EarP as the protein N-domain, which presumably binds  
 400 EF-P, remains highly flexible even in the crystal. Such a movement could relocate the putative  
 401 catalytic amino acids D13, D17 and E273 thereby forming the actual active site. In this catalytic state  
 402 (Figure 8C) the R32<sup>EF-P</sup> guanidino group might be activated especially by interactions with the  
 403 negatively charged side chains of D17<sup>EarP</sup> and E273<sup>EarP</sup> by a mechanism analogous to the one that  
 404 was reported for the oligosaccharyltransferase PglB.<sup>49</sup> In the EF-P rhamnosylation reaction, R271<sup>EarP</sup>  
 405 might stabilize the nucleotide product and thereby facilitates leaving group departure. Upon  
 406 successful inverting glycosyl transfer from TDP-Rha to R32<sup>EF-P</sup> presumably by a single S<sub>N</sub>2  
 407 displacement reaction, the products are released from the active site of EarP in turn reverting back to  
 408 the unbound ground state.

409 Altogether, our structural and biochemical investigation of EarP provides first insights into the  
 410 molecular mechanism of arginine glycosylation and with this improves our general understanding in  
 411 N-linked glycosylation. Additionally, our research might open up new avenues for the development of  
 412 antimicrobial drugs in order to fight e.g. *P. aeruginosa* infections.

413

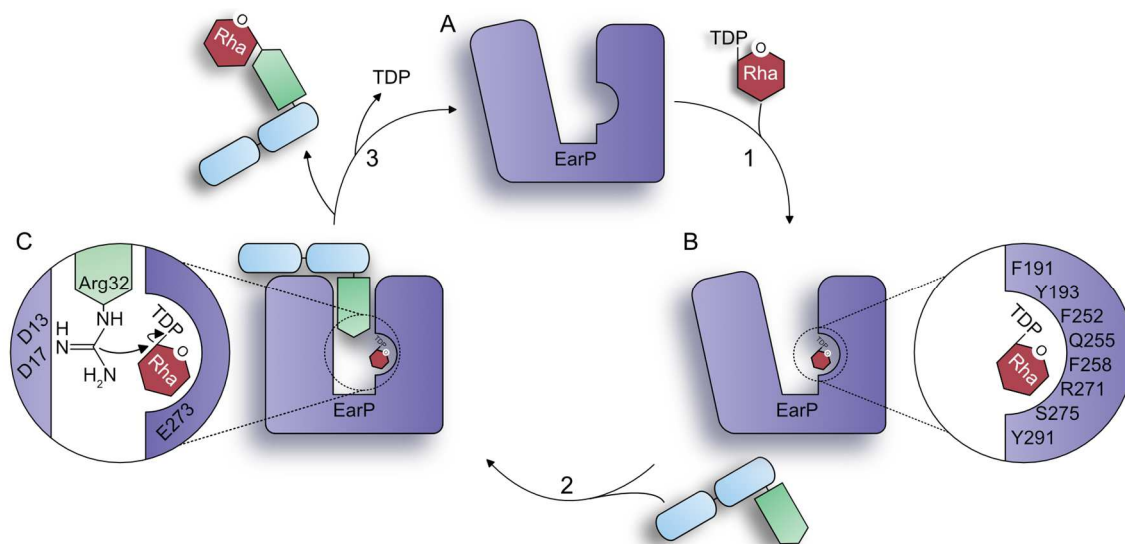

414 **Figure 8. Proposed glycosylation mechanism of EarP.**

415 **A)** Ground state; both the donor and acceptor binding site are unoccupied. **B)** Donor-bound state; TDP-Rha is bound and  
 416 oriented within the binding pocket in the protein C-domain. **C)** Catalytic state; The putative catalytic amino acids D13, D17 and  
 417 E273 facilitate the nucleophilic attack onto the anomer centre of TDP-Rha by activating the Arg32 guanidino group. The EarP  
 418 N-domain is stabilized upon binding of EF-P. Binding and dissociation events are indicated by arrows: 1, TDP-Rha binding; 2,  
 419 EF-P binding, 3, EF-P<sup>Rha</sup> and TDP dissociation.

## 421 MATERIALS AND METHODS

422 **Bacterial strains and growth conditions** Strains and plasmids used in this study are listed in Table  
423 S1. *P. putida* and *E. coli* were routinely grown in Lysogeny broth according to the Miller modification<sup>62</sup>  
424 at 30 °C (for *P. putida*) and 37 °C (for *E. coli*), unless indicated otherwise. When required, media were  
425 solidified by using 1.5% (wt/vol) agar. If necessary, media were supplemented with 50 µg/ml  
426 chloramphenicol, 100 µg/ml kanamycin sulphate, and/or 100 µg/ml ampicillin sodium salt. For  
427 promoter induction from plasmid P<sub>BAD</sub> containing plasmids, L-arabinose was added to a final  
428 concentration of 0.2% (wt/vol) in liquid medium. For promoter induction from plasmids comprising the  
429 *lac* operator sequences, Isopropyl β-D-1-thiogalactopyranoside (IPTG) (Sigma Aldrich) was added to  
430 a final concentration of 1 mM in liquid medium.

431  
432 **Molecular biology methods** Enzymes and kits were used according to the manufacturer's directions.  
433 Genomic DNA was obtained according to the protocol of Pospiech and Neumann<sup>63</sup> and plasmid DNA  
434 was isolated using a Hi-Yield plasmid Mini Kit (Suedlabor). DNA fragments were purified from  
435 agarose gels by employing a High-Yield PCR clean up and gel extraction kit (Suedlabor). Restriction  
436 endonucleases were purchased from New England Biolabs (NEB). Sequence amplifications by PCR  
437 were performed utilizing the Q5 high-fidelity DNA polymerase (NEB) or the *OneTaq* DNA polymerase  
438 (NEB), respectively. Mutations were introduced into the *earP* gene by overlap extension PCR.<sup>64</sup> All  
439 constructs were analysed by Sanger Sequencing (LMU Sequencing Service). Standard methods were  
440 performed according to Sambrook & Russel.<sup>65</sup>

441  
442 **β-Galactosidase activity assay** Cells expressing *lacZ* under control of the *cadBA* promoter were  
443 grown in buffered LB (pH 5.8) overnight (o/n) and harvested by centrifugation. β-galactosidase  
444 activities were determined as described in<sup>66</sup> in biological triplicates and are given in Miller units  
445 (MU).<sup>67</sup> The significance of the results was determined by applying two-sided students t-test and  
446 stating a result as significantly different if  $p < 0.05$ .

447  
448 **Bacterial two-hybrid analysis** Protein-protein interactions were detected using the Bacterial  
449 Adenylate Cyclase Two-Hybrid System Kit (Euromedex) according to the product manuals.  
450 Chemically competent<sup>68</sup> *E. coli* BTH101 cells were cotransformed with pUT18C-*efp<sub>Ppu</sub>* and/or the  
451 respective pKT25 variants (pKT25-*earP*, pKT25-D13A, pKT25-D17A, pKT25-E273A) and plated on  
452 LB screening medium containing 40 µg/ml 5-bromo-4-chloro-3-indolyl-β-D-galactopyranoside (X-gal),  
453 0.5 mM IPTG as well as kanamycin sulphate and ampicillin sodium salt. Transformants containing  
454 pUT18-*zip* and pKT25-*zip* were used as positive controls. Transformants carrying pUT18C and pKT25  
455 vector backbones were used as negative controls.  
456 Bacteria expressing interacting protein hybrids exhibit a blue phenotype on screening plates due to  
457 functional complementation of the CyaA fragments (T18 and T25). After 48 h of incubation at 30 °C  
458 plates containing around >100 colonies were evaluated. Representative colonies were transferred to  
459 liquid LB culture containing kanamycin sulphate and ampicillin sodium salt and incubated o/n at 30 °C.

460 Subsequently 2  $\mu$ l of the ON culture were spotted on LB X-Gal/IPTG plates. Pictures were taken after  
461 48 h of cultivation at 30 °C (Figure 7).

462

463 **Protein purification** C-terminal His<sub>6</sub>-tagged EarP<sub>Ppu</sub> variants (pBAD33-*earP<sub>Ppu</sub>*) were overproduced  
464 in *E. coli* LMG194 by addition of 0.2% arabinose to exponentially growing cells and subsequent  
465 cultivation at 18°C o/n. N-terminal His<sub>6</sub>-tagged EarP (pACYC-DUET-*earP<sub>Ppu</sub>*) and His<sub>6</sub>-SUMO-tagged  
466 EF-P<sub>Ppu</sub> (pET-SUMO-*efp<sub>Ppu</sub>*) were overproduced in *E. coli* BL21 (DE3) by addition of 1 mM IPTG to  
467 exponentially growing cells. Subsequently, cells were incubated at 18 °C overnight. Rhamnosylated  
468 EF-P<sub>Ppu</sub> (EF-P<sup>Rha</sup>) was produced by co-overproduction with His<sub>6</sub>-tagged EarP<sub>Ppu</sub>. Cells were lysed by  
469 sonication and His<sub>6</sub>-tagged proteins were purified using Ni-NTA (Qiagen) according to manufactures  
470 instructions. The His<sub>6</sub>-SUMO-tag was removed by incubation with 1 u/mg His<sub>6</sub>-*ulp1*<sup>69</sup> overnight.  
471 Subsequently Tag free EF-P<sub>Ppu</sub> was collected from the flow through after metal chelate affinity  
472 chromatography. For biochemical analyses cells were cultivated in LB. For use in NMR spectroscopy  
473 cells were grown in M9 minimal medium.<sup>62</sup> If necessary <sup>15</sup>N labelled nitrogen (<sup>15</sup>NH<sub>4</sub>Cl) and <sup>13</sup>C  
474 labelled glucose were used. For NMR backbone assignment of EarP<sub>Ppu</sub> additionally 99.8 % pure  
475 heavy water D<sub>2</sub>O (Sigma-Aldrich) was used instead of H<sub>2</sub>O in growth medium to allow partial  
476 deuteration of the protein in order to reduce cross-relaxation effects and increase signal-to-noise. For  
477 the production of selenomethylated EarP<sub>Ppu</sub>, *E. coli* BL21(DE3) cells expressing N-terminal His<sub>6</sub>-  
478 tagged EarP<sub>Ppu</sub> were cultivated in 1 L M9 minimal medium at 37 °C to an OD<sub>600</sub> of 0.6. 100  $\mu$ g  
479 threonine, 100  $\mu$ g lysine and 50  $\mu$ g isoleucine were added to feed-back inhibit methionine  
480 biosynthesis.<sup>70</sup> Additionally, 50  $\mu$ g L-(+)-selenomethionine was added 15 min prior induction. Protein  
481 production was induced by addition of 1 mM IPTG and cells were incubated at 18 °C overnight.  
482 Protein concentrations were determined as described by Bradford.<sup>71</sup> For biochemical analyses  
483 EarP<sub>Ppu</sub> and EF-P<sub>Ppu</sub> were dialyzed against 100 mM NaPi pH 7.6, 5 mM DTT whereas a buffer  
484 composed of 100 mM NaPi pH 7.6, 50 mM NaCl and 5 mM DTT was used when the proteins were  
485 subjected to NMR analysis.

486

487 **Synthesis of a single rhamnosyl-arginine containing glycopeptide** Moisture and air sensitive  
488 reactions were conducted in flame-dried glassware under an argon atmosphere. Commercially  
489 available reagents and solvents were used without further purification. CH<sub>2</sub>Cl<sub>2</sub> was distilled from  
490 calcium hydride and THF was distilled from sodium/benzophenone immediately prior to use. DMF was  
491 stored under argon in a flask containing 4 Å molecular sieves. Reactions were monitored by TLC with  
492 pre-coated silica gel 60 F<sub>254</sub> aluminum plates (*Merck KGaA*, Darmstadt) using UV light and  
493 methoxyphenol reagent (100 mL 0.2% ethanolic methoxyphenol solution and 100 mL 2 M ethanolic  
494 sulfuric acid) as visualizing agent. Flash chromatography was performed using silica gel (35–70  $\mu$ m)  
495 from *Acros Organics*. Peptide purification by RP-HPLC was performed on a *JASCO* purification  
496 system with a UV-Vis detector (model UV-2075Plus) using a *Phenomenex Aeris Peptide* 5u XB-C18  
497 column (250 × 21.2 mm). Analytical RP-HPLC was measured on a *JASCO* system with a  
498 *Phenomenex Aeris Peptide* 5u XB-C18 column (250 × 4.6 mm). In all cases, mixtures of water (eluent  
499 A) and acetonitrile (eluent B) were used as eluents; if required, 0.1% formic acid (FA) or 0.1%



500 trifluoroacetic acid (TFA) were added. HR-ESI mass spectra were recorded on a *Thermo Finnigan*  
501 *LTQ FT* mass spectrometer or on a *Bruker maxis* equipped with a *Waters Acquity UPLC* using a  
502 *Kinetex C18* column (2.6  $\mu$ , 100 A) at 40 °C.

503

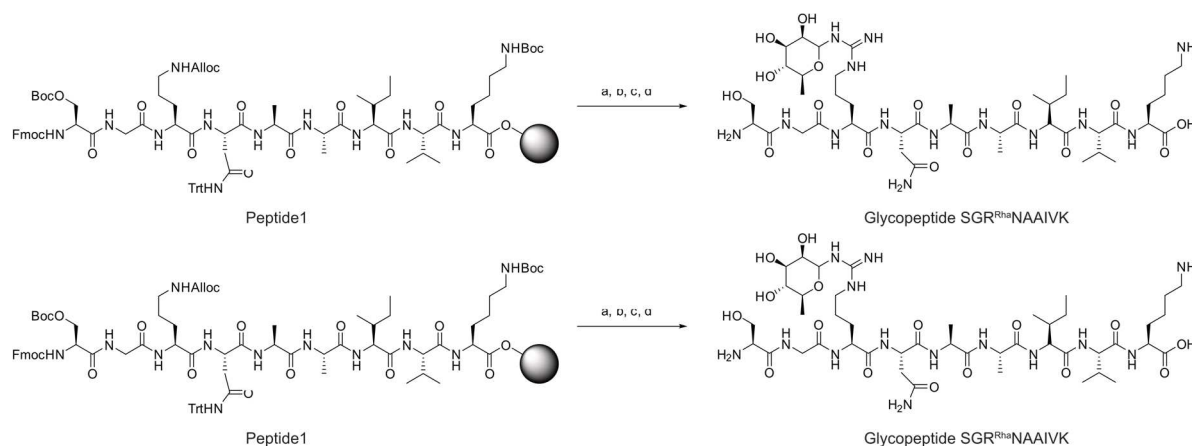

505  
506 Scheme 1: Synthesis of glycopeptide SGR<sup>Rha</sup>NAAIVK; a) SiPh<sub>3</sub>, Pd(PPh<sub>3</sub>)<sub>4</sub>, CH<sub>2</sub>Cl<sub>2</sub>; b) 1-(*tert*-Butoxycarbonyl)-3-(2,3,4-Tri-*O*-  
507 acetyl-6-deoxy-L-mannopyranosyl)-2-ethyl-isothiourea<sup>24</sup>, AgNO<sub>3</sub>, NEt<sub>3</sub>, DMF; c) N<sub>2</sub>H<sub>4</sub> · H<sub>2</sub>O (5% solution in DMF);  
508 d) TFA/H<sub>2</sub>O/phenol/TIPS (88/5/5/2).

509

510 Glycopeptide SGR<sup>Rha</sup>NAAIVK was synthesized using a *Liberty Blue*<sup>TM</sup> automated microwave peptide  
511 synthesizer followed by *on-resin* glycosylation and deprotection (scheme 1). For construction of  
512 peptide 1 0.1 mmol of preloaded H-Lys(Boc)-2-chlorotrityl resin (loading 0.78 mmol/g) were applied.  
513 Cleavage of Fmoc protecting group was achieved with 20% piperidine in DMF (75 °C, 35 W, 3 min).  
514 Fmoc-protected amino acids (5 eq.) were activated for peptide coupling using 5 eq. of ethyl  
515 (hydroxyimino)cyanoacetate (*OxymaPure*<sup>®</sup>), 0.5 eq. of DIPEA and 5 eq. of  
516 *N,N'*-Diisopropylcarbodiimide. All coupling reactions were conducted at 75 °C and 28 W for 5 min.  
517 Removal of the allyloxycarbonylprotecting group and subsequent coupling of the sugar moiety as well  
518 as deprotection of the acetyl groups were performed according to established procedures.<sup>24</sup> Final  
519 deprotection gave the desired glycopeptide SGR<sup>Rha</sup>NAAIVK in 39% yield after HPLC purification. The  
520 amino acid sequence of the glycopeptide corresponds to the primary structure of the *S. oneidensis*  
521 acceptor loop which is highly similar to the consensus sequence of EarP-arginine type EF-Ps.<sup>15</sup>

522

523 **HRMS** (ESI<sup>+</sup>): Calculated for C<sub>44</sub>H<sub>82</sub>N<sub>14</sub>O<sub>16</sub> [M+2H]<sup>2+</sup>:m/z = 531.3011; found: 531.3016.

524 **HPLC** (0.1% TFA, 0 min: 8% B → 45 min: 50% B, flow: 1 mL/min): *t*<sub>R</sub> = 9.61 min,  $\lambda$  = 204 nm.

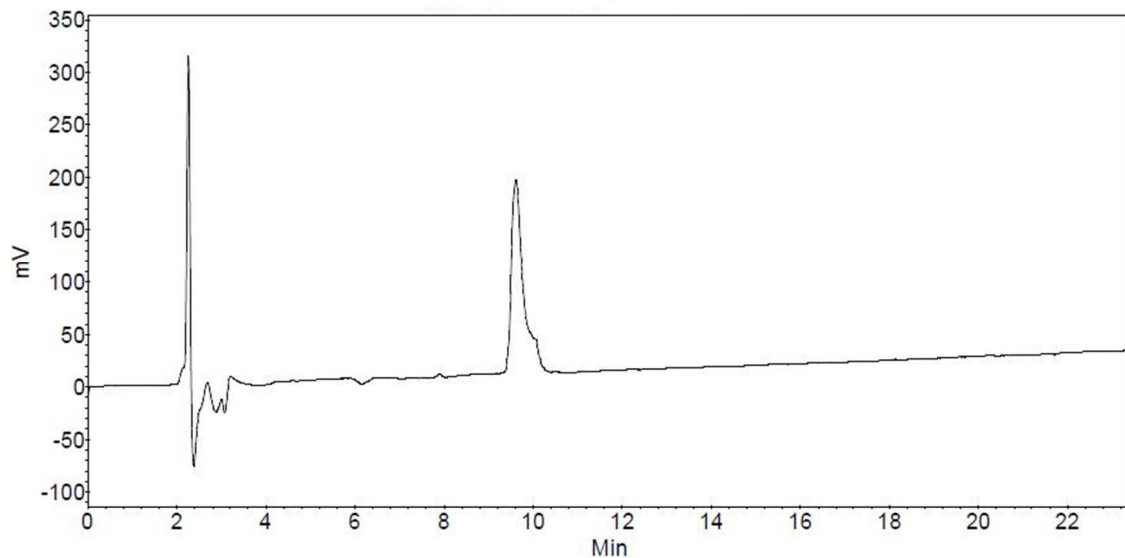

525

526 **Antibody generation** Polyclonal antibodies were raised commercially by Eurogentec according to the  
527 Rabbit – speedy 28 days (AS-Super-Antigen) program. The mono-rhamnosyl-arginine containing  
528 peptide was coupled to BSA according to an internal protocol (AS-PECO-05). Antibodies capable of  
529 binding to rhamnosyl-arginine were purified from rabbit sera by affinity chromatography (AS-PURI-  
530 MED) against the glycopeptide SGR<sup>Rha</sup>NAAIVK. To test the specificity of the purified polyclonal  
531 antibodies towards EF-P<sup>Rha</sup>, 1.5  $\mu$ g of unmodified and 0.5  $\mu$ g of modified EF-P were transferred to  
532 nitrocellulose membrane by Western Blotting. While polyclonal antibodies raised against EF-P from *S.*  
533 *oneidensis* detect both unmodified and modified EF-P<sub>Ppu</sub>, our  $\alpha$ Arg<sup>Rha</sup> very specifically detect only the  
534 modified protein variant (Figure S6).

535

536 **SDS-PAGE and Western Blot** Electrophoretic separation of proteins was carried out using SDS-  
537 PAGE as described by Lämmli.<sup>72</sup> Separated proteins were visualized in-gel using 0.5% (v/v) 2-2-2-  
538 trichloroethanol<sup>45</sup> and transferred onto nitrocellulose membrane by vertical Western blotting. Antigens  
539 were detected using 0.1  $\mu$ g/ml Anti-6X His tag® (Abcam), 0.2  $\mu$ g/ml  $\alpha$ EF-P<sup>24</sup> or 0.25  $\mu$ g/ml of  $\alpha$ Arg<sup>Rha</sup>  
540 respectively. Primary antibodies (RABBIT) were targeted by 0.2  $\mu$ g/ml alkaline phosphatase  
541 conjugated Anti-RABBIT IgG (H&L) (GOAT) antibody (Rockland) and target proteins were visualized  
542 by addition of substrate solution (50 mM sodium carbonate buffer, pH 9.5, 0.001% (w/v) Nitro-Blue-  
543 Tetrazolium, 0,045% (w/v) 5-Bromo-4-chloro-3-indolyphosphate).

544

545 **Determination of kinetic parameters** Kinetic parameters were determined by varying TDP-Rha  
546 concentrations but keeping concentrations of EarP<sub>Ppu</sub> (0.1  $\mu$ M) and unmodified EF-P<sub>Ppu</sub> (2.5  $\mu$ M)  
547 constant. A mixture of EarP<sub>Ppu</sub> and unmodified EF-P<sub>Ppu</sub> was equilibrated to 30°C in 100 mM NaPi pH  
548 7.6. The reaction was started by addition of TDP-Rha and was stopped after 20 seconds of incubation  
549 at 30 °C by the addition of one volume 2x Lämmli buffer<sup>72</sup> and incubation at 95 °C for 5 minutes.  
550 Samples were subjected to SDS-PAGE and rhamnosylated EF-P<sub>Ppu</sub> was detected as described above.  
551 Band intensities were quantified using ImageJ.<sup>46</sup> Product formation (nmol\*mg<sup>-1</sup>) was calculated

552 relative to fully (*in vivo*) rhamnosylated EF-P<sub>Ppu</sub>.  $K_m$  and  $k_{cat}$  values were determined by fitting reaction  
553 rates ( $\text{nmol}\cdot\text{mg}^{-1}\cdot\text{s}^{-1}$ ) to the Michaelis-Menten equation using SigmaPlot. Time-course experiments  
554 conducted at a TDP-Rha concentration of 500  $\mu\text{M}$  show that the rhamnosylation reaction is not  
555 saturated after 20 seconds of incubation (Figure S12).

556

557 **Fold Recognition** Fold recognition models were generated using the online user interface of PHYRE<sup>2</sup>  
558 <sup>32, 73</sup>, SWISS-MODEL<sup>74-77</sup> and the I-TASSER<sup>33-35</sup> server as instructed on the website. Model structures  
559 were selected from the array of results according to best confidence-, qmean- and z-scores  
560 respectively. All images of tertiary protein structures in this work were generated using the UCSF  
561 Chimera package developed by the Resource for Biocomputing, Visualization, and Informatics at the  
562 University of California, San Francisco.<sup>38</sup> Protein structures were obtained as .pdb files from  
563 [www.rcsb.org](http://www.rcsb.org)<sup>78</sup> or the respective modelling platforms mentioned above.

564

565 **Determination of intracellular TDP-Rha concentrations** Cells were grown in 1 L LB to an OD<sub>600</sub> of  
566 0.5 ( $5\cdot 10^8$  cells/ml), harvested by centrifugation and resuspended in 25 ml 100 mM NaPi pH = 7.6  
567 ( $2\cdot 10^{10}$  cells/ml). After disruption of cells using a Constant Systems Ltd continuous flow cabinet at  
568 1.35 kBar, cell debris were removed by centrifugation and lysates were sterilized by filtration  
569 (Steriflip®). A mixture of EarP<sub>Ppu</sub> (0.1  $\mu\text{M}$ ) and unmodified EF-P<sub>Ppu</sub> (2.5  $\mu\text{M}$ ) was equilibrated to 30°C in  
570 10  $\mu\text{l}$  100 mM NaPi pH = 7.6. The reaction was started by addition of 10  $\mu\text{l}$  lysate from  $\sim 2\cdot 10^7$  or  
571  $\sim 2\cdot 10^8$  cells respectively and stopped after 20 seconds of incubation at 30 °C by addition of one  
572 volume 2x Lämmli buffer<sup>72</sup> and incubation at 95 °C for 5 minutes. In parallel, a TDP-Rha calibration  
573 series was generated by addition of TDP-Rha at final concentrations ranging from 5  $\mu\text{M}$  to 160  $\mu\text{M}$   
574 including the linear range of the rhamnosylation reaction rate (Figure 4). Samples were subjected to  
575 SDS-PAGE and rhamnosylated EF-P<sub>Ppu</sub> was detected as described above. Band intensities were  
576 quantified using ImageJ.<sup>46</sup> TDP-Rha concentrations in samples containing lysate were calculated by  
577 dividing the respective relative band intensities by the slope of the corresponding calibration curve (5  
578  $\mu\text{M}$  to 80  $\mu\text{M}$  TDP-Rha). Intracellular TDP-Rha concentrations were calculated from the amount of  
579 substance per cell while assuming equal contribution of TDP-Rha across all cells as well as an  
580 average cell volume of 3.9  $\mu\text{m}^3$  <sup>79</sup> for *E. coli* and 2.1  $\mu\text{M}^3$  <sup>80</sup> for *P. putida* and *P. aeruginosa*  
581 respectively.

582

### 583 **NMR spectroscopy**

584 *Backbone assignment of EF-P and EarP.*

585 All NMR experiments were performed at 298K on Bruker Avance III spectrometers with a magnetic  
586 field strength corresponding to a proton Larmor frequency of 600 MHz equipped with a Bruker TXI  
587 cryogenic probehead, 700 MHz equipped with a Bruker room temperature probehead or 800 MHz  
588 equipped with a Bruker TXI cryogenic probehead. All datasets were processed using NMRPipe.<sup>76</sup>  
589 Before NMR measurements of <sup>15</sup>N- and <sup>13</sup>C labelled EF-P (700  $\mu\text{M}$ ) in 100 mM NaPi, 50 mM NaCl  
590 and 5 mM DTT, pH 7.6, 0.02 % NaN<sub>3</sub> was added to the sample. Sequential resonance assignment  
591 was obtained from 2D <sup>1</sup>H-<sup>15</sup>N-HSQC, 3D HNCA, CBCACONH, and HNCACB experiments, using

592 constant time during  $^{13}\text{C}$  evolution.<sup>81</sup> The assignment process was assisted by CARA  
593 (<http://cara.nmr.ch>) and CcpNmr Analysis<sup>82</sup> a 7 % was obtained. Missing assignment for residues  
594 other than prolines are S123, R133, N140, V164, D175 and G185. Secondary chemical shift analysis  
595 was performed based on the difference of measured  $^{13}\text{C}_\alpha$  and  $^{13}\text{C}_\beta$  chemical shifts to random coil  
596 chemical shifts of the same nuclei to assign secondary structure to the EF-P sequence (Figure S10)  
597 and confirm the validity of the model shown in Figure 6.<sup>83-84</sup>

598 Due to the size of EarP (43 kDa) backbone resonance assignment was only possible for  $^2\text{H}$ ,  $^{15}\text{N}$ ,  $^{13}\text{C}$ -  
599 labelled samples to reduce the number of protons and thus cross-relaxation effects, which also  
600 enables efficient acquisition of backbone assignment experiments in TROSY-mode<sup>85</sup>. TROSY-HNCA,  
601 - HNACB, and -CBCACONH experiments<sup>86</sup>, processed by NMRPipe<sup>87</sup> and analysed using CARA  
602 (<http://cara.nmr.ch>) enabled backbone resonance assignment of 62 % of all assignable residues  
603 (excluding prolines).

604 The NMR titrations were always performed by adding unlabelled interaction partner to  $^{15}\text{N}$ -labelled  
605 protein sample and monitoring the progress of the titration by recording  $^1\text{H}$ - $^{15}\text{N}$  HSQC. First,  $^{15}\text{N}$ -  
606 labelled 150  $\mu\text{M}$  unmodified EF-P was titrated with unlabelled EarP to 1:2 EF-P:EarP molar ratio with  
607 intermediate steps at 1:0, 1:0.5, 1:1 and 1:1.5 EF-P:EarP molar ratio.  $^{15}\text{N}$ -labelled 41  $\mu\text{M}$   
608 rhamnosylated EF-P was titrated with unlabelled EarP to 1:2 EF-P:EarP molar ratio without any  
609 intermediate steps.  $^{15}\text{N}$ -labelled 540  $\mu\text{M}$  wild-type EarP was titrated with unlabelled TDP-Rha to 1:5  
610 EarP:TDP-Rha molar ratio with intermediate steps at 1:0, 1:0.2, 1:1 and 1:3 molar ratio.  $^{15}\text{N}$  labelled  
611 186  $\mu\text{M}$  D13A or 209  $\mu\text{M}$  D17A EarP variants were titrated by the addition of TDP-Rha to  
612 approximately 1:10 molar ratio with no intermediate steps. To analyse the EF-P:EarP and wildtype  
613 EarP:TDP-Rha titration the chemical shift perturbations were calculated according to formula:  $CSP =$   
614  $\sqrt{\Delta\sigma_H^2 + (\Delta\sigma_N \cdot 0.15)^2}$ , where 0.15 is the weighing factor to account for nitrogen resonances generally  
615 spanning a broader frequency range.

616 To check proper folding of EarP variants  $^1\text{H}$ - $^{15}\text{N}$  HSQC spectra of  $^{15}\text{N}$ -labelled EarP variants were  
617 recorded for following single amino acid substitutions at following concentrations: 209  $\mu\text{M}$  D13A, 209  
618  $\mu\text{M}$  D17A, 162  $\mu\text{M}$  F191A, 197  $\mu\text{M}$  Y193A, 139  $\mu\text{M}$  D274A, 186  $\mu\text{M}$  R271A and 162  $\mu\text{M}$  Y291A.

619

## 620 **Small-angle X-ray scattering**

621 Thirty microliters of EarP, EarP + TDP-rhamnose, and buffer (with and without TDP-rhamnose) were  
622 measured at 20°C at the BioSAXS beamline BM29 at the European Synchrotron Radiation Facility  
623 using a 2D Pilatus detector. For each measurement ten frames with 1 s exposure time per frame were  
624 recorded for each EarP and buffer sample, using an X-ray wavelength of  $\lambda = 0.9919$  Å.  
625 Measurements were performed in flow mode where samples are pushed through a capillary at a  
626 constant flow rate to minimize radiation damage. The protein concentrations measured were 1.0, 2.0,  
627 4.0 and 8.0 mg/ml. TDP-Rha was used in 7:1 excess (ligand protein), respectively. The buffer  
628 measurements were subtracted from each protein sample and the low Q range of 1.0 mg/ml was  
629 merged with the high Q range of the 8.0 mg/ml sample, using PRIMUS<sup>88</sup>. The merging was done due  
630 to the rising scattering density at low Q ranges for the higher concentrated samples, indicative of



631 aggregation. CRY SOL<sup>89</sup> was used to fit the back-calculated scattering densities from the crystal  
632 structure to the experimental data.

633

### 634 **X-ray crystallography**

635 For crystallization N-terminal His<sub>6</sub>-tagged EarP<sub>Pp</sub> expressed as a seleno-methionine derivative was  
636 used. The protein was dialysed to 50mM Tris, 100mM NaCl, 1mM DTT, pH 7.6, concentrated to 183  
637  $\mu$ M and TDP-Rha was added to final concentration of 10 mM. The crystallization condition was 0.2M  
638 ammonium acetate, 0.1M bis-tris pH 6.0 and 27% (w/v) PEG 3350. A Full dataset was collected at the  
639 ID29 beamline, ESRF, Grenoble at a wavelength of 0.9793111Å (absorption peak for selenium) and  
640 15.05% beam transmission with 0.15° oscillation range, 0.037s exposure time and 2400 frames. The  
641 space group was determined to be I4. The dataset was phased using single anomalous dispersion  
642 (SAD) by Crank2<sup>90</sup> automatic pipeline in CCP4<sup>91</sup> using Afro provided by Pannu, N.S. (unpublished) for  
643 F<sub>A</sub> estimation, Crunch2<sup>92</sup> for substructure detection and Solomon<sup>93</sup> for density modification. The initial  
644 structure was built in Phenix Autobuild<sup>94</sup> and was completed by several rounds of manual model  
645 building in Coot<sup>95</sup> and refinement in Phenix<sup>94</sup>.

646

### 647 **ACCESSION CODES**

648 Atomic coordinates of EarP<sub>Ppu</sub> have been deposited in the Protein Data Bank with accession number  
649 XXX, while NMR backbone chemical shifts for EarP<sub>Ppu</sub> and EF-P<sub>Ppu</sub> are available at the BMRB  
650 (accession numbers: XXXXX and XXXXX).

### 651 **ACKNOWLEDGEMENTS**

652 We want to thank Ingrid Weilt for excellent technical assistance. We thank Wolfram Volkwein for  
653 fruitful discussions. The SAXS and X-ray diffraction experiments were performed on beamlines BM29  
654 and ID29, respectively, at the European Synchrotron Radiation Facility (ESRF), Grenoble, France.  
655 We are grateful to Local Contacts at the ESRF for providing assistance in using beamlines BM29 and  
656 ID29.

### 657 **COMPETING INTERESTS**

658 The authors declare no competing interest.

### 659 **FUNDING**

660 JL, KJ and AHR gratefully acknowledge financial support by the DFG Research Training Group  
661 GRK2062 (Molecular Principles of Synthetic Biology). J.H. acknowledges support from the European  
662 Molecular Biology Laboratory (EMBL). KJ and AHR additionally thank the Center for integrated  
663 Protein Science Munich, a Cluster of Excellence (Exc114/1). The work of JR, PM and AKJ was  
664 supported by the US National Institutes of Health grant # GM 105977.

665

## 666 AUTHOR CONTRIBUTION

667 AHR, SW and DG performed the organic synthesis and NMR analysis of small molecules and wrote  
668 the corresponding material and method section of the manuscript. R. K. performed the confirmation of  
669 antibody specificity raised against the rhamnosyl arginine comprising peptide. Additionally, RK  
670 constructed the EarP<sub>Ppu</sub> and EF-P<sub>Ppu</sub> encoding plasmids and purified all proteins used for biochemical  
671 analyses, NMR studies and X-ray crystallography. RK also performed the biochemical *in vivo* /  
672 *in vitro* characterization of EarP<sub>Ppu</sub> and determined concentrations of TDP-β-L-rhamnose in *E. coli*, *P.*  
673 *putida* and *P. aeruginosa*. TDP-β-L-rhamnose was synthesized by JR, PM and AKJ. JH and JM  
674 performed and analysed all protein NMR experiments. The crystallisation screen was set up by JM.  
675 JH, JM and PKAJ solved the crystal structure of EarP<sub>Ppu</sub>. JL, JH and KJ designed the study. The  
676 manuscript was written by RK, JM, KJ, JH and JL.

677

678

## 679 REFERENCES

- 680 1. Varenne, S.; Buc, J.; Lloubes, R.; Lazdunski, C., Translation is a non-uniform process. Effect  
681 of tRNA availability on the rate of elongation of nascent polypeptide chains. *J. Mol. Biol.* **1984**, *180* (3),  
682 549-76.
- 683 2. Pavlov, M. Y.; Watts, R. E.; Tan, Z.; Cornish, V. W.; Ehrenberg, M.; Forster, A. C., Slow  
684 peptide bond formation by proline and other N-alkylamino acids in translation. *Proc. Natl. Acad. Sci.*  
685 *U.S.A.* **2009**, *106* (1), 50-4.
- 686 3. Tanner, D. R.; Cariello, D. A.; Woolstenhulme, C. J.; Broadbent, M. A.; Buskirk, A. R., Genetic  
687 identification of nascent peptides that induce ribosome stalling. *J. Biol. Chem.* **2009**, *284* (50), 34809-  
688 18.
- 689 4. Woolstenhulme, C. J.; Parajuli, S.; Healey, D. W.; Valverde, D. P.; Petersen, E. N.; Starosta,  
690 A. L.; Guydosh, N. R.; Johnson, W. E.; Wilson, D. N.; Buskirk, A. R., Nascent peptides that block  
691 protein synthesis in bacteria. *Proc. Natl. Acad. Sci. U.S.A.* **2013**, *110* (10), E878-87.
- 692 5. Gutierrez, E.; Shin, B. S.; Woolstenhulme, C. J.; Kim, J. R.; Saini, P.; Buskirk, A. R.; Dever, T.  
693 E., eIF5A promotes translation of polyproline motifs. *Mol. Cell* **2013**, *51* (1), 35-45.
- 694 6. Ude, S.; Lassak, J.; Starosta, A. L.; Kraxenberger, T.; Wilson, D. N.; Jung, K., Translation  
695 elongation factor EF-P alleviates ribosome stalling at polyproline stretches. *Science* **2013**, *339* (6115),  
696 82-5.
- 697 7. Doerfel, L. K.; Wohlgemuth, I.; Kothe, C.; Peske, F.; Urlaub, H.; Rodnina, M. V., EF-P is  
698 essential for rapid synthesis of proteins containing consecutive proline residues. *Science* **2013**, *339*  
699 (6115), 85-8.
- 700 8. Peil, L.; Starosta, A. L.; Lassak, J.; Atkinson, G. C.; Virumae, K.; Spitzer, M.; Tenson, T.; Jung,  
701 K.; Remme, J.; Wilson, D. N., Distinct X/PP/X sequence motifs induce ribosome stalling, which is  
702 rescued by the translation elongation factor EF-P. *Proc. Natl. Acad. Sci. U.S.A.* **2013**, *110* (38),  
703 15265-70.
- 704 9. Hersch, S. J.; Wang, M.; Zou, S. B.; Moon, K. M.; Foster, L. J.; Ibba, M.; Navarre, W. W.,  
705 Divergent protein motifs direct elongation factor P-mediated translational regulation in *Salmonella*  
706 *enterica* and *Escherichia coli*. *mBio* **2013**, *4* (2), e00180-13.
- 707 10. Starosta, A. L.; Lassak, J.; Peil, L.; Atkinson, G. C.; Virumae, K.; Tenson, T.; Remme, J.; Jung,  
708 K.; Wilson, D. N., Translational stalling at polyproline stretches is modulated by the sequence context  
709 upstream of the stall site. *Nucleic Acids Res.* **2014**, *42* (16), 10711-9.
- 710 11. Elgamal, S.; Katz, A.; Hersch, S. J.; Newsom, D.; White, P.; Navarre, W. W.; Ibba, M., EF-P  
711 dependent pauses integrate proximal and distal signals during translation. *PLoS Genet.* **2014**, *10* (8),  
712 e1004553.
- 713 12. Woolstenhulme, C. J.; Guydosh, N. R.; Green, R.; Buskirk, A. R., High-precision analysis of  
714 translational pausing by ribosome profiling in bacteria lacking EF-P. *Cell Rep.* **2015**, *11* (1), 13-21.

- 715 13. Hanawa-Suetsugu, K.; Sekine, S.; Sakai, H.; Hori-Takemoto, C.; Terada, T.; Unzai, S.; Tame,  
716 J. R.; Kuramitsu, S.; Shirouzu, M.; Yokoyama, S., Crystal structure of elongation factor P from  
717 *Thermus thermophilus* HB8. *Proc. Natl. Acad. Sci. U.S.A.* **2004**, *101* (26), 9595-600.
- 718 14. Blaha, G.; Stanley, R. E.; Steitz, T. A., Formation of the first peptide bond: the structure of EF-  
719 P bound to the 70S ribosome. *Science* **2009**, *325* (5943), 966-70.
- 720 15. Lassak, J.; Keilhauer, E. C.; Fürst, M.; Wuichet, K.; Gödeke, J.; Starosta, A. L.; Chen, J. M.;  
721 Sogaard-Andersen, L.; Rohr, J.; Wilson, D. N.; Haussler, S.; Mann, M.; Jung, K., Arginine-  
722 rhamnosylation as new strategy to activate translation elongation factor P. *Nat. Chem. Biol.* **2015**, *11*  
723 (4), 266-70.
- 724 16. Doerfel, L. K.; Wohlgemuth, I.; Kubyshev, V.; Starosta, A. L.; Wilson, D. N.; Budisa, N.;  
725 Rodnina, M. V., Entropic contribution of elongation factor P to proline positioning at the catalytic  
726 center of the ribosome. *J. Am. Chem. Soc.* **2015**.
- 727 17. Lassak, J.; Wilson, D. N.; Jung, K., Stall no more at polyproline stretches with the translation  
728 elongation factors EF-P and IF-5A. *Mol. Microbiol.* **2016**, *99* (2), 219-35.
- 729 18. Bailly, M.; de Crecy-Lagard, V., Predicting the pathway involved in post-translational  
730 modification of elongation factor P in a subset of bacterial species. *Biol. Direct* **2010**, *5*, 3.
- 731 19. Navarre, W. W.; Zou, S. B.; Roy, H.; Xie, J. L.; Savchenko, A.; Singer, A.; Edvokimova, E.;  
732 Prost, L. R.; Kumar, R.; Ibba, M.; Fang, F. C., PoxA, YjeK, and elongation factor P coordinately  
733 modulate virulence and drug resistance in *Salmonella enterica*. *Mol. Cell* **2010**, *39* (2), 209-21.
- 734 20. Yanagisawa, T.; Sumida, T.; Ishii, R.; Takemoto, C.; Yokoyama, S., A paralog of lysyl-tRNA  
735 synthetase aminoacylates a conserved lysine residue in translation elongation factor P. *Nat. Struct.*  
736 *Mol. Biol.* **2010**, *17* (9), 1136-43.
- 737 21. Peil, L.; Starosta, A. L.; Virumae, K.; Atkinson, G. C.; Tenson, T.; Remme, J.; Wilson, D. N.,  
738 Lys34 of translation elongation factor EF-P is hydroxylated by YfcM. *Nat. Chem. Biol.* **2012**, *8* (8),  
739 695-7.
- 740 22. Rajkovic, A.; Erickson, S.; Witzky, A.; Branson, O. E.; Seo, J.; Gafken, P. R.; Frietas, M. A.;  
741 Whitelegge, J. P.; Faull, K. F.; Navarre, W.; Darwin, A. J.; Ibba, M., Cyclic rhamnosylated elongation  
742 factor P establishes antibiotic resistance in *Pseudomonas aeruginosa*. *mBio* **2015**, *6* (3).
- 743 23. Yanagisawa, T.; Takahashi, H.; Suzuki, T.; Masuda, A.; Dohmae, N.; Yokoyama, S.,  
744 *Neisseria meningitidis* translation elongation factor P and its active-site arginine residue are essential  
745 for cell viability. *PLoS One* **2016**, *11* (2), e0147907.
- 746 24. Li, X.; Krafczyk, R.; Macošek, J.; Li, Y.-L.; Zou, Y.; Simon, B.; Pan, X.; Wu, Q.-Y.; Yan, F.; Li,  
747 S.; Hennig, J.; Jung, K.; Lassak, J.; Hu, H.-G., Resolving the  $\alpha$ -glycosidic linkage of arginine-  
748 rhamnosylated translation elongation factor P triggers generation of the first Arg<sup>Rha</sup> specific antibody.  
749 *Chem. Sci.* **2016**.
- 750 25. Wang, S.; Corcilius, L.; Sharp, P. P.; Rajkovic, A.; Ibba, M.; Parker, B. L.; Payne, R. J.,  
751 Synthesis of rhamnosylated arginine glycopeptides and determination of the glycosidic linkage in  
752 bacterial elongation factor P. *Chem. Sci.* **2017**.
- 753 26. Coutinho, P. M.; Deleury, E.; Davies, G. J.; Henrissat, B., An evolving hierarchical family  
754 classification for glycosyltransferases. *J. Mol. Biol.* **2003**, *328* (2), 307-17.
- 755 27. Breton, C.; Fournel-Gigleux, S.; Palcic, M. M., Recent structures, evolution and mechanisms  
756 of glycosyltransferases. *Curr. Opin. Struct. Biol.* **2012**, *22* (5), 540-9.
- 757 28. Singh, D. G.; Lomako, J.; Lomako, W. M.; Whelan, W. J.; Meyer, H. E.; Serwe, M.; Metzger, J.  
758 W.,  $\beta$ -Glucosylarginine: a new glucose-protein bond in a self-glucosylating protein from sweet corn.  
759 *FEBS Lett.* **1995**, *376* (1-2), 61-4.
- 760 29. Li, S.; Zhang, L.; Yao, Q.; Li, L.; Dong, N.; Rong, J.; Gao, W.; Ding, X.; Sun, L.; Chen, X.;  
761 Chen, S.; Shao, F., Pathogen blocks host death receptor signalling by arginine GlcNAcylation of  
762 death domains. *Nature* **2013**, *501* (7466), 242-6.
- 763 30. Pearson, J. S.; Giogha, C.; Ong, S. Y.; Kennedy, C. L.; Kelly, M.; Robinson, K. S.; Lung, T.  
764 W.; Mansell, A.; Riedmaier, P.; Oates, C. V.; Zaid, A.; Muhlen, S.; Crepin, V. F.; Marches, O.; Ang, C.  
765 S.; Williamson, N. A.; O'Reilly, L. A.; Bankovacki, A.; Nachbur, U.; Infusini, G.; Webb, A. I.; Silke, J.;  
766 Strasser, A.; Frankel, G.; Hartland, E. L., A type III effector antagonizes death receptor signalling  
767 during bacterial gut infection. *Nature* **2013**, *501* (7466), 247-51.
- 768 31. Guex, N.; Peitsch, M. C., SWISS-MODEL and the Swiss-PdbViewer: an environment for  
769 comparative protein modeling. *Electrophoresis* **1997**, *18* (15), 2714-23.
- 770 32. Kelley, L. A.; Sternberg, M. J., Protein structure prediction on the Web: a case study using the  
771 Phyre server. *Nat. Protoc.* **2009**, *4* (3), 363-71.
- 772 33. Zhang, Y., I-TASSER server for protein 3D structure prediction. *BMC bioinformatics* **2008**, *9*,  
773 40.

- 774 34. Roy, A.; Kucukural, A.; Zhang, Y., I-TASSER: a unified platform for automated protein  
775 structure and function prediction. *Nat. Protoc.* **2010**, *5* (4), 725-38.
- 776 35. Yang, J.; Yan, R.; Roy, A.; Xu, D.; Poisson, J.; Zhang, Y., The I-TASSER Suite: protein  
777 structure and function prediction. *Nat. Methods* **2015**, *12* (1), 7-8.
- 778 36. Ha, S.; Walker, D.; Shi, Y.; Walker, S., The 1.9 Å crystal structure of *Escherichia coli* MurG, a  
779 membrane-associated glycosyltransferase involved in peptidoglycan biosynthesis. *Protein Sci.* **2000**,  
780 *9* (6), 1045-52.
- 781 37. Martinez-Fleites, C.; Macauley, M. S.; He, Y.; Shen, D. L.; Vocadlo, D. J.; Davies, G. J.,  
782 Structure of an O-GlcNAc transferase homolog provides insight into intracellular glycosylation. *Nat.*  
783 *Struct. Mol. Biol.* **2008**, *15* (7), 764-5.
- 784 38. Pettersen, E. F.; Goddard, T. D.; Huang, C. C.; Couch, G. S.; Greenblatt, D. M.; Meng, E. C.;  
785 Ferrin, T. E., UCSF Chimera--a visualization system for exploratory research and analysis. *J. Comput.*  
786 *Chem.* **2004**, *25* (13), 1605-12.
- 787 39. Cao, B.; Porollo, A.; Adamczak, R.; Jarrell, M.; Meller, J., Enhanced recognition of protein  
788 transmembrane domains with prediction-based structural profiles. *Bioinformatics (Oxford, England)*  
789 **2006**, *22* (3), 303-9.
- 790 40. Shen, Y.; Delaglio, F.; Cornilescu, G.; Bax, A., TALOS+: a hybrid method for predicting  
791 protein backbone torsion angles from NMR chemical shifts. *J. Biomol. NMR* **2009**, *44* (4), 213-23.
- 792 41. Liang, D. M.; Liu, J. H.; Wu, H.; Wang, B. B.; Zhu, H. J.; Qiao, J. J., Glycosyltransferases:  
793 mechanisms and applications in natural product development. *Chem. Soc. Rev.* **2015**, *44* (22), 8350-  
794 74.
- 795 42. Sievers, F.; Higgins, D. G., Clustal Omega, accurate alignment of very large numbers of  
796 sequences. *Methods Mol. Biol.* **2014**, *1079*, 105-16.
- 797 43. Sievers, F.; Wilm, A.; Dineen, D.; Gibson, T. J.; Karplus, K.; Li, W.; Lopez, R.; McWilliam, H.;  
798 Remmert, M.; Soding, J.; Thompson, J. D.; Higgins, D. G., Fast, scalable generation of high-quality  
799 protein multiple sequence alignments using Clustal Omega. *Molecular systems biology* **2011**, *7*, 539.
- 800 44. Boels, I. C.; Beerthuyzen, M. M.; Kusters, M. H.; Van Kaauwen, M. P.; Kleerebezem, M.; De  
801 Vos, W. M., Identification and functional characterization of the *Lactococcus lactis* *rfb* operon,  
802 required for dTDP-rhamnose Biosynthesis. *J. Bacteriol.* **2004**, *186* (5), 1239-48.
- 803 45. Ladner, C. L.; Yang, J.; Turner, R. J.; Edwards, R. A., Visible fluorescent detection of proteins  
804 in polyacrylamide gels without staining. *Anal. Biochem.* **2004**, *326* (1), 13-20.
- 805 46. Schneider, C. A.; Rasband, W. S.; Eliceiri, K. W., NIH Image to ImageJ: 25 years of image  
806 analysis. *Nat. Methods* **2012**, *9* (7), 671-5.
- 807 47. Choi, S.; Choe, J., Crystal structure of elongation factor P from *Pseudomonas aeruginosa* at  
808 1.75 Å resolution. *Proteins* **2011**, *79* (5), 1688-93.
- 809 48. Lairson, L. L.; Henrissat, B.; Davies, G. J.; Withers, S. G., Glycosyltransferases: structures,  
810 functions, and mechanisms. *Annu. Rev. Biochem.* **2008**, *77*, 521-55.
- 811 49. Lizak, C.; Gerber, S.; Numao, S.; Aebi, M.; Locher, K. P., X-ray structure of a bacterial  
812 oligosaccharyltransferase. *Nature* **2011**, *474* (7351), 350-5.
- 813 50. Karimova, G.; Pidoux, J.; Ullmann, A.; Ladant, D., A bacterial two-hybrid system based on a  
814 reconstituted signal transduction pathway. *Proc. Natl. Acad. Sci. U.S.A.* **1998**, *95* (10), 5752-6.
- 815 51. Park, M. H.; Cooper, H. L.; Folk, J. E., The biosynthesis of protein-bound hypusine (N epsilon  
816 -(4-amino-2-hydroxybutyl)lysine). Lysine as the amino acid precursor and the intermediate role of  
817 deoxyhypusine (N epsilon -(4-aminobutyl)lysine). *J. Biol. Chem.* **1982**, *257* (12), 7217-22.
- 818 52. Rajkovic, A.; Hummels, K. R.; Witzky, A.; Erickson, S.; Gafken, P. R.; Whitelegge, J. P.; Faull,  
819 K. F.; Kearns, D. B.; Ibbá, M., Translation Control of Swarming Proficiency in *Bacillus subtilis* by 5-  
820 Amino-pentanoylated Elongation Factor P. *J. Biol. Chem.* **2016**, *291* (21), 10976-85.
- 821 53. Spiro, R. G., Protein glycosylation: nature, distribution, enzymatic formation, and disease  
822 implications of glycopeptide bonds. *Glycobiology* **2002**, *12* (4), 43R-56R.
- 823 54. Wong Fok Lung, T.; Giogha, C.; Creuzburg, K.; Ong, S. Y.; Pollock, G. L.; Zhang, Y.; Fung, K.  
824 Y.; Pearson, J. S.; Hartland, E. L., Mutagenesis and Functional Analysis of the Bacterial Arginine  
825 Glycosyltransferase Effector NleB1 from Enteropathogenic *Escherichia coli*. *Infect. Immun.* **2016**, *84*  
826 (5), 1346-60.
- 827 55. Sun, H. Y.; Lin, S. W.; Ko, T. P.; Pan, J. F.; Liu, C. L.; Lin, C. N.; Wang, A. H.; Lin, C. H.,  
828 Structure and mechanism of *Helicobacter pylori* fucosyltransferase. A basis for lipopolysaccharide  
829 variation and inhibitor design. *J. Biol. Chem.* **2007**, *282* (13), 9973-82.
- 830 56. Hu, Y.; Chen, L.; Ha, S.; Gross, B.; Falcone, B.; Walker, D.; Mokhtarzadeh, M.; Walker, S.,  
831 Crystal structure of the MurG:UDP-GlcNAc complex reveals common structural principles of a  
832 superfamily of glycosyltransferases. *Proc. Natl. Acad. Sci. U.S.A.* **2003**, *100* (3), 845-9.



- 833 57. Lira-Navarrete, E.; Valero-Gonzalez, J.; Villanueva, R.; Martinez-Julvez, M.; Tejero, T.;  
834 Merino, P.; Panjikar, S.; Hurtado-Guerrero, R., Structural insights into the mechanism of protein O-  
835 fucosylation. *PLoS One* **2011**, *6* (9), e25365.
- 836 58. Katz, A.; Solden, L.; Zou, S. B.; Navarre, W. W.; Ibba, M., Molecular evolution of protein-RNA  
837 mimicry as a mechanism for translational control. *Nucleic Acids Res.* **2014**, *42* (5), 3261-71.
- 838 59. Joe, Y. A.; Park, M. H., Structural features of the eIF-5A precursor required for  
839 posttranslational synthesis of deoxyhypusine. *J. Biol. Chem.* **1994**, *269* (41), 25916-21.
- 840 60. Qasba, P. K.; Ramakrishnan, B.; Boeggeman, E., Substrate-induced conformational changes  
841 in glycosyltransferases. *Trends Biochem. Sci.* **2005**, *30* (1), 53-62.
- 842 61. Ni, L.; Sun, M.; Yu, H.; Chokhawala, H.; Chen, X.; Fisher, A. J., Cytidine 5'-monophosphate  
843 (CMP)-induced structural changes in a multifunctional sialyltransferase from *Pasteurella multocida*.  
844 *Biochemistry* **2006**, *45* (7), 2139-48.
- 845 62. Miller, J. H., Experiments in molecular genetics. *Cold Spring Harbor, N.Y.* **1972**.
- 846 63. Pospiech, A.; Neumann, B., A versatile quick-prep of genomic DNA from gram-positive  
847 bacteria. *Trends Genet.* **1995**, *11* (6), 217-8.
- 848 64. Ho, S. N.; Hunt, H. D.; Horton, R. M.; Pullen, J. K.; Pease, L. R., Site-directed mutagenesis by  
849 overlap extension using the polymerase chain reaction. *Gene* **1989**, *77* (1), 51-9.
- 850 65. Sambrook, J.; Russell, D. W., *Molecular Cloning: A Laboratory Manual*. third ed.; Cold Spring  
851 Harbor Laboratory Press: 2001.
- 852 66. Tetsch, L.; Koller, C.; Haneburger, I.; Jung, K., The membrane-integrated transcriptional  
853 activator CadC of *Escherichia coli* senses lysine indirectly via the interaction with the lysine permease  
854 LysP. *Mol. Microbiol.* **2008**, *67* (3), 570-83.
- 855 67. Miller, J. H., *A short course in bacterial genetics: a laboratory manual and handbook for*  
856 *Escherichia coli and related bacteria*. Cold Spring Harbor Laboratory N.Y., 1992.
- 857 68. Inoue, H.; Nojima, H.; Okayama, H., High efficiency transformation of *Escherichia coli* with  
858 plasmids. *Gene* **1990**, *96* (1), 23-8.
- 859 69. Starosta, A. L.; Lassak, J.; Peil, L.; Atkinson, G. C.; Woolstenhulme, C. J.; Virumae, K.;  
860 Buskirk, A.; Tenson, T.; Remme, J.; Jung, K.; Wilson, D. N., A conserved proline triplet in Val-tRNA  
861 synthetase and the origin of elongation factor P. *Cell Rep.* **2014**, *9* (2), 476-83.
- 862 70. Gallii, G., Regulation of Lysine and Threonine Synthesis. *Plant Cell* **1995**, *7* (7), 899-906.
- 863 71. Bradford, M. M., A rapid and sensitive method for the quantitation of microgram quantities of  
864 protein utilizing the principle of protein-dye binding. *Anal. Biochem.* **1976**, *72*, 248-54.
- 865 72. Laemmli, U. K., Cleavage of structural proteins during the assembly of the head of  
866 bacteriophage T4. *Nature* **1970**, *227* (5259), 680-5.
- 867 73. Kelley, L. A.; Mezulis, S.; Yates, C. M.; Wass, M. N.; Sternberg, M. J. E., The Phyre2 web  
868 portal for protein modeling, prediction and analysis. *Nat. Protoc.* **2015**, *10* (6), 845-858.
- 869 74. Arnold, K.; Bordoli, L.; Kopp, J.; Schwede, T., The SWISS-MODEL workspace: a web-based  
870 environment for protein structure homology modelling. *Bioinformatics (Oxford, England)* **2006**, *22* (2),  
871 195-201.
- 872 75. Kiefer, F.; Arnold, K.; Kunzli, M.; Bordoli, L.; Schwede, T., The SWISS-MODEL Repository  
873 and associated resources. *Nucleic Acids Res.* **2009**, *37* (Database issue), D387-92.
- 874 76. Guex, N.; Peitsch, M. C.; Schwede, T., Automated comparative protein structure modeling  
875 with SWISS-MODEL and Swiss-PdbViewer: a historical perspective. *Electrophoresis* **2009**, *30* Suppl  
876 *1*, S162-73.
- 877 77. Biasini, M.; Bienert, S.; Waterhouse, A.; Arnold, K.; Studer, G.; Schmidt, T.; Kiefer, F.; Gallo  
878 Cassarino, T.; Bertoni, M.; Bordoli, L.; Schwede, T., SWISS-MODEL: modelling protein tertiary and  
879 quaternary structure using evolutionary information. *Nucleic Acids Res.* **2014**, *42* (Web Server issue),  
880 W252-8.
- 881 78. Berman, H. M.; Westbrook, J.; Feng, Z.; Gilliland, G.; Bhat, T. N.; Weissig, H.; Shindyalov, I.  
882 N.; Bourne, P. E., The Protein Data Bank. *Nucleic Acids Res.* **2000**, *28* (1), 235-42.
- 883 79. Volkmer, B.; Heinemann, M., Condition-dependent cell volume and concentration of  
884 *Escherichia coli* to facilitate data conversion for systems biology modeling. *PLoS One* **2011**, *6* (7),  
885 e23126.
- 886 80. Cohen, D.; Mechold, U.; Nevenzal, H.; Yarmiyhu, Y.; Randall, T. E.; Bay, D. C.; Rich, J. D.;  
887 Parsek, M. R.; Kaefer, V.; Harrison, J. J.; Banin, E., Oligoribonuclease is a central feature of cyclic  
888 diguanylate signaling in *Pseudomonas aeruginosa*. *Proc. Natl. Acad. Sci. U.S.A.* **2015**, *112* (36),  
889 11359-64.
- 890 81. Sattler, M.; Schleucher, J.; Griesinger, C., Heteronuclear multidimensional NMR experiments  
891 for the structure determination of proteins in solution employing pulsed field gradients. *Prog. Nucl.*  
892 *Mag. Res. Sp.* **1999**, *34* (2), 93-158.

- 893 82. Vranken, W. F.; Boucher, W.; Stevens, T. J.; Fogh, R. H.; Pajon, A.; Llinas, M.; Ulrich, E. L.;  
894 Markley, J. L.; Ionides, J.; Laue, E. D., The CCPN data model for NMR spectroscopy: development of  
895 a software pipeline. *Proteins* **2005**, *59* (4), 687-96.
- 896 83. Schwarzing, S.; Kroon, G. J.; Foss, T. R.; Chung, J.; Wright, P. E.; Dyson, H. J., Sequence-  
897 dependent correction of random coil NMR chemical shifts. *J. Am. Chem. Soc.* **2001**, *123* (13), 2970-8.
- 898 84. Wishart, D. S.; Bigam, C. G.; Holm, A.; Hodges, R. S.; Sykes, B. D., <sup>1</sup>H, <sup>13</sup>C and <sup>15</sup>N  
899 random coil NMR chemical shifts of the common amino acids. I. Investigations of nearest-neighbor  
900 effects. *J. Biomol. NMR* **1995**, *5* (1), 67-81.
- 901 85. Pervushin, K.; Riek, R.; Wider, G.; Wuthrich, K., Attenuated T2 relaxation by mutual  
902 cancellation of dipole-dipole coupling and chemical shift anisotropy indicates an avenue to NMR  
903 structures of very large biological macromolecules in solution. *Proc. Natl. Acad. Sci. U.S.A.* **1997**, *94*  
904 (23), 12366-71.
- 905 86. Salzmann, M.; Pervushin, K.; Wider, G.; Senn, H.; Wuthrich, K., TROSY in triple-resonance  
906 experiments: new perspectives for sequential NMR assignment of large proteins. *Proc. Natl. Acad.*  
907 *Sci. U.S.A.* **1998**, *95* (23), 13585-90.
- 908 87. Delaglio, F.; Grzesiek, S.; Vuister, G. W.; Zhu, G.; Pfeifer, J.; Bax, A., NMRPipe: a  
909 multidimensional spectral processing system based on UNIX pipes. *J. Biomol. NMR* **1995**, *6* (3), 277-  
910 93.
- 911 88. Konarev, P. V., Volkov, V.V., Sokolova, A.V., Koch, M.H.J., Svergun, D.I., PRIMUS - a  
912 Windows-PC based system for small-angle scattering data analysis. *J. Appl. Cryst.* **2003**, *36*, 1277-  
913 1282.
- 914 89. Svergun, D. I., Barberato, C., Koch, M.H.J., CRY SOL- a program to evaluate X-ray solution  
915 scattering of biological macromolecules from atomic coordinates. *J. Appl. Cryst.* **1995**, *28*, 768-773.
- 916 90. Skubak, P.; Pannu, N. S., Automatic protein structure solution from weak X-ray data. *Nat.*  
917 *Commun.* **2013**, *4*, 2777.
- 918 91. Winn, M. D.; Ballard, C. C.; Cowtan, K. D.; Dodson, E. J.; Emsley, P.; Evans, P. R.; Keegan,  
919 R. M.; Krissinel, E. B.; Leslie, A. G.; McCoy, A.; McNicholas, S. J.; Murshudov, G. N.; Pannu, N. S.;  
920 Potterton, E. A.; Powell, H. R.; Read, R. J.; Vagin, A.; Wilson, K. S., Overview of the CCP4 suite and  
921 current developments. *Acta Crystallogr. D Biol. Crystallogr.* **2011**, *67* (Pt 4), 235-42.
- 922 92. de Graaff, R. A.; Hilge, M.; van der Plas, J. L.; Abrahams, J. P., Matrix methods for solving  
923 protein substructures of chlorine and sulfur from anomalous data. *Acta Crystallogr. D Biol. Crystallogr.*  
924 **2001**, *57* (Pt 12), 1857-62.
- 925 93. Abrahams, J. P.; Leslie, A. G., Methods used in the structure determination of bovine  
926 mitochondrial F1 ATPase. *Acta Crystallogr. D Biol. Crystallogr.* **1996**, *52* (Pt 1), 30-42.
- 927 94. Adams, P. D.; Afonine, P. V.; Bunkoczi, G.; Chen, V. B.; Davis, I. W.; Echols, N.; Headd, J. J.;  
928 Hung, L. W.; Kapral, G. J.; Grosse-Kunstleve, R. W.; McCoy, A. J.; Moriarty, N. W.; Oeffner, R.; Read,  
929 R. J.; Richardson, D. C.; Richardson, J. S.; Terwilliger, T. C.; Zwart, P. H., PHENIX: a comprehensive  
930 Python-based system for macromolecular structure solution. *Acta Crystallogr. D Biol. Crystallogr.*  
931 **2010**, *66* (Pt 2), 213-21.
- 932 95. Emsley, P.; Cowtan, K., Coot: model-building tools for molecular graphics. *Acta Crystallogr. D*  
933 *Biol. Crystallogr.* **2004**, *60* (Pt 12 Pt 1), 2126-32.

934
